# Supplementary material for: Eckpunktepapier 2016 zur notfallmedizinischen Versorgung der Bevölkerung in der Prähospitalphase und in der Klinik
Source: Springer Nature journal article supplement (doi:10.1007/s10049-016-0187-0), 2016-07-07
Supplement: MOESM1 [file 10675664]

**Autoren des Eckpunktepapiers 2016 (in alphabetischer Reihenfolge):**

D. Andresen, A. Bohn, F. Brunkhorst, M. Dichgans, M. Fischer, S. Flohé, J.T. Gräsner, F. Hoffmann, R. Hoffmann, E. Kehrberger, H. Marung, G. Matthes, U.M. Mauer, Hp. Moecke (†), T. Nicolai, T. Paffrath, S. Prückner, J. Röther, K. H. Scholz, U. Schweigkofler, H. Trentzsch, B. Urban, C. Wölfl

| **Autor** | **Institution** |
| --- | --- |
| D. Andresen | Prof. Dr. med. Dietrich Andresen  Kardiologie an der Evangelischen Elisabeth Klinik, Berlin Mitte  Akademisches Lehrkrankenhaus der  Charité – Universitätsmedizin Berlin  Lützowstraße 24–26  10785 Berlin |
| A. Bohn | Priv.-Doz. Dr. med. Andreas Bohn  Ärztlicher Leiter Rettungsdienst  Feuerwehr Münster  York-Ring 25  48159 Münster |
| F. Brunkhorst | Univ.- Prof. Dr. med. Frank M. Brunkhorst  Klinik für Anaesthesiologie und Intensivtherapie  Universitätsklinikum Jena  07747 Jena |
| M. Dichgans | Prof. Dr. med. Martin Dichgans  Direktor  Institut für Schlaganfall- und Demenzforschung (ISD)  Klinikum der Universität München  Ludwig-Maximilians-Universität  Feodor-Lynen-Straße 17  81377 München |
| M. Fischer | Prof. Dr. med. Matthias Fischer  1. Vorsitzender Arbeitsgemeinschaft Südwestdeutscher Notärzte e.V.  agswn e.V.  Geschäftsstelle  Rita-Maiburg-Straße 2  70794 Filderstadt  und  Chefarzt  Klinik für Anästhesiologie, Operative Intensivmedizin, Notfallmedizin und Schmerztherapie  Klinik am Eichert  Eichertstr. 3  73035 Göppingen |
| S. Flohé | Prof. Dr. med. Sascha Flohé  Chefarzt  Klinik für Unfallchirurgie, Orthopädie und Handchirurgie  Städtisches Klinikum Solingen gemeinnützige GmbH  Gotenstraße 1  42653 Solingen |
| J.T. Gräsner | Priv.-Doz. Dr. med. Jan-Thorsten Gräsner  Direktor  Institut für Rettungs- und Notfallmedizin  Universitätsklinikum Schleswig-Holstein, Campus Kiel  Arnold-Heller-Str. 3  24105 Kiel |
| F. Hoffmann | PD Dr. med. Florian Hoffmann  Kinderklinik und Kinderpoliklinik im Dr. von Haunerschen Kinderspital  Klinikum der Universität München  Ludwig-Maximilians-Universität  Lindwurmstr. 4  80337 München |
| R. Hoffmann | Prof. Dr. med. Reinhard Hoffmann  Ärztlicher Direktor  Chefarzt Unfallchirurgie und Orthopädische Chirurgie  BG Unfallklinik Frankfurt am Main gGmbH  Friedberger Landstraße 430  60389 Frankfurt am Main |
| E. Kehrberger | Dr. med. Eduard Kehrberger  Stellvertretender Vorsitzender Arbeitsgemeinschaft Südwestdeutscher Notärzte e.V.  agswn e.V.  Geschäftsstelle  Rita-Maiburg-Straße 2  70794 Filderstadt  und  Ltd. Oberarzt  Klinik für Anästhesiologie und operative Intensivmedizin, Kreiskliniken Esslingen – Paracelsus-Krankenhaus, Ruit  Hedelfinger Straße 166  73760 Ostfildern |
| H. Marung | Dr. med. med. Hartwig Marung  Oberarzt und Leiter Bereich Qualitätsmanagement  Institut für Rettungs- und Notfallmedizin  Universitätsklinikum Schleswig-HolsteinArnold-Heller-Str. 3  24105 Kiel  bis August 2015:  Asklepios Kliniken Hamburg  Institut für Notfallmedizin (IfN)  c/o Eißendorfer Pferdeweg 52, Haus 2 b  21075 Hamburg |
| G. Matthes | Prof. Dr. med. Gerrit Matthes  Oberarzt  Klinik für Unfallchirurgie und Orthopädie  Unfallkrankenhaus Berlin  Warenerstr. 7  12683 Berlin  und  Universitätsmedizin Greifswald  Klinik und Poliklinik für Chirurgie  Abteilung für Unfall- und Wiederherstellungschirurgie  Ferdinand-Sauerbruch-Str.  17475 Greifswald |
| U.M. Mauer | Prof. Dr. med. U. M. Mauer  Leitender Oberarzt, OFA  Abt. Neurochirurgie  Bundeswehrkrankenhaus Ulm  89081 Ulm |
| Hp. Moecke (†) | Prof. Dr. med. Heinzpeter Moecke  Konzernbereich Medizin &Wissenschaft  Asklepios Kliniken GmbH  Leiter des Instituts für Notfallmedizin Hamburg |
| T. Nicolai | Prof. Dr. med. Thomas Nicolai  Leitender Oberarzt  Kinderklinik und Kinderpoliklinik im Dr. von Haunerschen Kinderspital  Klinikum der Universität München  Ludwig-Maximilians-Universität  Lindwurmstr. 4  80337 München |
| T. Paffrath | Dr. med. Thomas Paffrath  Ltd. Oberarzt der Klinik für Unfallchirurgie, Orthopädie & Sporttraumatologie  Lehrstuhl für Unfallchirurgie & Orthopädie  Klinikum der Privaten Universität Witten/Herdecke  Ostmerheimer Str. 200  51109 Köln |
| S. Prückner | Dr. med. Stephan Prückner  Geschäftsführender Direktor  Institut für Notfallmedizin und Medizinmanagement – INM  Klinikum der Universität München  Ludwig-Maximilians-Universität  Schillerstr. 53  80336 München |
| J. Röther | Prof. Dr. med. Joachim Röther  Chefarzt  Neurologische Abteilung mit überregionaler Stroke Unit,  Neurophysiologie und Neurologischer Intensivmedizin  Asklepios Klinik Altona  Paul-Ehrlich-Straße 1  22763 Hamburg |
| K. H. Scholz | Prof. Dr. med. Karl Heinrich Scholz  Chefarzt  Klinik für Kardiologie und Internistische Intensivmedizin - Medizinische Klinik I  St. Bernward Krankenhaus GmbH  Treibestraße 9  31134 Hildesheim |
| U. Schweigkofler | Dr. med. Uwe Schweigkofler  Leitender Arzt des Notfall- und Rettungszentrums  Geschäftsführender Oberarzt  Unfallchirurgie und Orthopädische Chirurgie  BG Unfallklinik Frankfurt am Main gGmbH  Friedberger Landstraße 430  60389 Frankfurt am Main |
| H. Trentzsch | Dr. med. Heiko Trentzsch  Institut für Notfallmedizin und Medizinmanagement – INM  Klinikum der Universität München  Ludwig-Maximilians-Universität  Schillerstr. 53  80336 München |
| B. Urban | Dr. med. Bert Urban  Institut für Notfallmedizin und Medizinmanagement – INM  Klinikum der Universität München  Ludwig-Maximilians-Universität  Schillerstr. 53  80336 München |
| C. Wölfl | Priv. Doz. Dr. med. habil Christoph G. Wölfl  Chefarzt  Klinik für Orthopädie, Unfallchirurgie und Sporttraumatologie  Krankenhaus Hetzelstift  Stiftstraße 10  67434 Neustadt/Weinstraße |
