# Supplementary material for: Eckpunktepapier 2016 zur notfallmedizinischen Versorgung der Bevölkerung in der Prähospitalphase und in der Klinik
Source: Springer Nature journal article supplement (doi:10.1007/s10049-016-0187-0), 2016-07-07
Supplement: MOESM2 [file 10675664]

**Anhang zum Eckpunktepapier 2016**

***Tracerdiagnose schweres Schädelhirntrauma***

U.M. Mauer1), M. Fischer2,3,*), E. Kehrberger2,4,*), H. Marung5,6,*), Hp. Moecke(†)6,*), S. Prückner7,*), H. Trentzsch7,*), B. Urban7,*) und Fachexperten der Eckpunktepapier- Konsensus-Gruppe

1) Abt. Neurochirurgie, Bundeswehrkrankenhaus Ulm, Ulm

2) Arbeitsgemeinschaft Südwestdeutscher Notärzte e.V. (agswn), Filderstadt

3) Klinik für Anästhesiologie, Operative Intensivmedizin, Notfallmedizin und Schmerztherapie, Klinik am Eichert, Göppingen

4) Klinik für Anästhesiologie und operative Intensivmedizin, Kreiskliniken Esslingen – Paracelsus-Krankenhaus, Ruit

5) Institut für Rettungs- und Notfallmedizin, Universitätsklinikum Schleswig-Holstein, Campus Kiel, Kiel

6) Institut für Notfallmedizin (IfN), Asklepios Klinikum Harburg, Hamburg

7) Institut für Notfallmedizin und Medizinmanagement (INM), Klinikum der Universität München, Ludwig-Maximilians-Universität, München

*) Core Group, in alphabetischer Reihenfolge

**Einführung / Vorbemerkung**

In Deutschland muss pro Jahr von 332 Patienten mit Schädelhirnverletzungen pro 100.000 Einwohner ausgegangen werden, davon sind 91% als leicht, 4% als mittel und 5% als schwer einzustufen. Hochgerechnet sind ca. 250.000 Patienten mit Schädelhirntrauma (SHT) pro Jahr in Deutschland zu versorgen, wovon etwa 2.750 Patienten versterben. Die gesamtgesellschaftlichen Kosten betragen für das SHT in Deutschland ca. 2,8 Milliarden €/Jahr [[1](#_ENREF_1)].

**Prozessqualität Leitstelle**

Bei einem Verletzten mit Hinweisen auf schwere Verletzung gelten die Kriterien des Notarztindikationskataloges der BÄK: Neben ganz offensichtlichen Verletzungen des Kopfes muss insbesondere bei Verletzten mit kurzzeitiger oder andauernder Bewusstlosigkeit an ein Schädelhirntrauma gedacht werden. Auch wenn der Patient nach kurzer Bewusstlosigkeit wieder kontaktfähig ist, besteht die Indikation zur Entsendung eines Notarztes.

**Diagnostik und Therapie durch Notarzt und Rettungsdienst**

Für die Ersteinschätzung von schädelhirnverletzten Patienten sollte der Unfallmechanismus berücksichtigt und die Bewusstseinslage, die Pupillomotorik und das Vorliegen einer Hemi- bzw. Paraparese untersucht werden. Die Schwere des Schädelhirntraumas kann klinisch anhand der Glasgow-Coma-Scale (GCS) abgeschätzt werden. Liegt keine Bewusstlosigkeit vor, kann zusätzlich Orientierung, Amnesie, Hirnnervenfunktion, Koordination und Sprachfunktion beurteilt werden.

Insbesondere bei nicht beurteilbaren (z.B. intubierten, analgo-sedierten, intoxikierten) Patienten ist eine regelmäßige Kontrolle der Pupillomotorik im Verlauf sehr wichtig.

Es sollte bedacht werden, dass Bewusstseinsstörungen als Unfallursache auch aus anderer Ursache entstehen können, z.B. Hypoglykämie, kardiovaskuläre (Herzinfarkt, Lungenembolie) und zerebrovaskuläre Erkrankungen (Schlaganfall, Subarachnoidalblutung) sowie Intoxikationen.

Absoluten Vorrang hat die Sicherstellung der Herz-Kreislauffunktionen durch Stillen offensichtlicher Blutungen, Substitution von Flüssigkeitsverlusten und ggf. die Gabe geeigneter Katecholamine. Es sollten iso-osmolare, balancierte Lösungen verwendet werden. Hypo-osmolare Lösungen sollen nicht verwendet werden. Hyper-osmolare Lösungen können verwendet werden [[2](#_ENREF_2)]. Anzustreben ist eine arterielle Normotonie. Beim Erwachsenen sollte der systolische Blutdruck nicht unter 90mmHg sinken [[2](#_ENREF_2), [3](#_ENREF_3)].

Bei Patienten mit schwerem SHT soll einem sekundären Hirnschaden durch eine adäquate Oxygenierung und einem ausreichenden zerebralen Perfusionsdruck vorgebeugt werden. Für das konkrete therapeutische Vorgehen sei auf die gültigen Leitlinien verwiesen. Bei bewusstlosen Patienten (Orientierungswert GCS ≤8) besteht die Indikation zur Notfallnarkose mit Rapid Sequence Induction, Intubation und Beatmung [[4](#_ENREF_4)]. Begleitende Verletzungen, die die Oxygenierung und/oder Ventilation beeinträchtigen (z.B. Pneumothorax, Hämatothorax) sollen erkannt und notfallmäßig behandelt werden. Anzustreben sind eine Normoxie und Normokapnie. Bei schwieriger oder unmöglicher Intubation kann auf eine supraglottische Atemwegssicherung (SGA) ausgewichen werden. Ein Absinken der pulsoximetrischen Sauerstoffsättigung unter 90% sollte vermieden werden [[2](#_ENREF_2), [3](#_ENREF_3)]

Bei offenem Schädelhirntrauma ist die Wunde steril zu verbinden. Perforierende Fremdkörper sollten belassen werden. Bei bewusstlosen Patienten sollte bis zum Abschluss der radiologischen Diagnostik vom Vorliegen einer instabilen Wirbelsäulenfraktur ausgegangen werden.

**Einsatztaktik und Zeitmanagement**

Patienten mit schwerem Schädelhirntrauma sollen höchstens 60 Minuten nach Notrufeingang in einer geeigneten Klinik aufgenommen werden.

**Geeignetes Krankenhaus**

Bei schwerem Schädelhirntrauma sollte ein zertifiziertes Traumazentrum mit einer neurochirurgischen Fachabteilung und einer jederzeit einsatzbereiten Computertomographie (CT) angefahren bzw. angeflogen werden. Überregionale Versorgungsmöglichkeiten unter Einbeziehung der Luftrettung müssen in die Planung einbezogen werden. Ist unter den am nächsten erreichbaren Krankenhäusern keine Einrichtung mit neurochirurgischer Fachabteilung vorhanden, so sollte, insbesondere bei kardiopulmonal instabilen Patienten und/oder Patienten mit Zeichen der Einklemmung, ein langer primärer Transport vermieden werden und als Alternative ein zertifiziertes Traumazentrum mit der Möglichkeit zur Bildgebung und zur neuro-traumatologischen Intervention angefahren bzw. angeflogen werden.

**Klinische Erstversorgung**

Für die frühklinische Versorgung gelten die aktuellen Leitlinien-Empfehlungen [[2](#_ENREF_2), [3](#_ENREF_3)] bzw. S2e-Leitlinie der Deutschen Gesellschaft für Neurochirurgie (derzeit in Überarbeitung). Nach initialer Stabilisierung im Schockraum soll der Patient unmittelbar mittels CT untersucht werden. Raumfordernde intrakranielle Verletzungen sollen notfallmäßig operativ versorgt werden [[2](#_ENREF_2)]. Daher wird empfohlen, dass es möglich sein sollte bei gegebener OP-Indikation innerhalb von 90 Minuten nach Notrufeingang mit einer lebensrettenden Notfalloperation beginnen zu können. Ziel der Therapie ist die Aufrechterhaltung der physiologischen Homöostase mit Gewährleistung einer ausreichenden Perfusion und Oxygenierung des Gehirns.

Im Falle einer neurologischen Verschlechterung soll eine (Kontroll-) CT durchgeführt werden [[2](#_ENREF_2)]. Liegen interventionspflichtige Verletzungen vor oder reichen konventionelle Maßnahmen zur Kontrolle des Hirndrucks alleine nicht aus, so kann es erforderlich sein, durch eine chirurgische Intervention eine Druckentlastung z.B. mittels Entlastungscraniektomie oder Blutungskontrolle herbeizuführen. Es gilt, das Ausmaß der sekundären Hirnschädigung zu begrenzen und den funktionsgeschädigten, aber nicht zerstörten Zellen des Gehirns optimale Bedingungen für die funktionelle Regeneration zu geben. Als nicht-operative Maßnahmen bei Verdacht auf stark erhöhten intrakraniellen Druck, insbesondere bei Zeichen der transtentoriellen Herniation (Pupillenerweiterung, Strecksynergismen, Streckreaktion auf Schmerzreiz, progrediente Bewusstseinstrübung), können Hyperventilation, Mannitol, Hypertone Kochsalzlösung angewandt werden. Die Messung des intrakraniellen Druckes kann bei bewusstlosen schädelhirnverletzten Patienten erfolgen [[2](#_ENREF_2)].

**Instrumente des Qualitätsmanagements**

Die Versorgungsqualität sollte durch externen Qualitätsvergleich (Benchmarking) überprüft werden. Hierbei sollten die Einhaltung der o.g. Zeitintervalle, aber auch der leitliniengerechten Therapie und der Anteil von Sekundärverlegungen als Indikator für die adäquate Patientenversorgung herangezogen werden. Als externes Qualitätsmanagement-Verfahren steht primär das TraumaRegister DGU® zur Verfügung, an dem alle Traumazentren im Rahmen der TraumaNetzwerke DGU® teilnehmen. Kliniken und der Rettungsdienst sollten diese Daten für ihr Qualitätsmanagement nutzen.

**Literatur**

1. Rickels, E., ed. *Schädel-Hirn-Verletzung Epidemiologie und Versorgung : Ergebnisse einer prospektiven Studie*. Vol. München ; New York. 2006, Zuckschwerdt.

2. Deutsche Gesellschaft für Unfallchirurgie. *S3 – Leitlinie Polytrauma/Schwerverletzten-Behandlung*, 2011. Herunterladen unter: <http://www.awmf.org/leitlinien/detail/ll/012-019.html> [letzter Zugriff: 15.12.2015].

3. Bullock, M. and J. Povlishock, eds. *Guidelines for the management of severe traumatic brain injury. 3rd Edition.* 2007/05/22 ed. J Neurotrauma. Vol. 24 Suppl 1. 2007. S1-106.

4. Bernard, S.A., et al., *Prehospital rapid sequence intubation improves functional outcome for patients with severe traumatic brain injury: a randomized controlled trial.* Ann Surg, 2010. **252**(6): p. 959-65.
