# Supplementary material for: Eckpunktepapier 2016 zur notfallmedizinischen Versorgung der Bevölkerung in der Prähospitalphase und in der Klinik
Source: Springer Nature journal article supplement (doi:10.1007/s10049-016-0187-0), 2016-07-07
Supplement: MOESM3 [file 10675664]

**Anhang zum Eckpunktepapier 2016**

***Tracerdiagnose Schlaganfall***

J. Röther1) ,M. Dichgans2),A. Bohn3), M. Fischer4,5,*), E. Kehrberger4,6,*), H. Marung7,8,*), Hp. Moecke(†)8,*), S. Prückner9,*), H. Trentzsch9,*), B. Urban9,*) und Fachexperten der Eckpunktepapier- Konsensus-Gruppe

1) Neurologische Abteilung mit überregionaler Stroke Unit, Neurophysiologie und Neurologischer Intensivmedizin, Asklepios Klinik Altona, Hamburg

2) Institut für Schlaganfall- und Demenzforschung (ISD), Klinikum der Universität München, Ludwig-Maximilians-Universität, München

3) Ärztlicher Leiter Rettungsdienst, Feuerwehr Münster, Münster

4) Arbeitsgemeinschaft Südwestdeutscher Notärzte e.V. (agswn), Filderstadt

5) Klinik für Anästhesiologie, Operative Intensivmedizin, Notfallmedizin und Schmerztherapie, Klinik am Eichert, Göppingen

6) Klinik für Anästhesiologie und operative Intensivmedizin, Kreiskliniken Esslingen – Paracelsus-Krankenhaus, Ruit

7) Institut für Rettungs- und Notfallmedizin, Universitätsklinikum Schleswig-Holstein, Campus Kiel, Kiel

8) Institut für Notfallmedizin (IfN), Asklepios Klinikum Harburg, Hamburg

9) Institut für Notfallmedizin und Medizinmanagement (INM), Klinikum der Universität München, Ludwig-Maximilians-Universität, München

*) Core Group, in alphabetischer Reihenfolge

**Vorbemerkung:**

Jährlich ereignen sich 260.000 Schlaganfälle, die nach Versorgung durch den Rettungsdienst zu einer stationären Aufnahme führen [[1](#_ENREF_1)]. Aufgaben des Rettungsdienstes sind das Erstellen der Verdachtsdiagnose, die rasche Stabilisierung der Vitalfunktionen und die schnellstmögliche Zuführung in ein geeignetes Krankenhaus mit Stroke Unit und neuroradiologischer Diagnostik. Damit leistet der Rettungsdienst einen wichtigen Beitrag bei der zielgerichteten Zuweisung ausnahmslos in Krankenhäuser, die Versorgungsstrukturen für eine sofortige differenzierte Diagnostik und Therapie vorhalten. Eine hohe Prozessqualität im Rettungsdienst trägt zur Begrenzung von Folgeschäden bei und hat somit direkte Auswirkungen auf das neurologische Ergebnis der Behandlung.

**Prozessqualität Leitstelle**

Zuverlässige Erkennung der Notfallsituation

Das Erkennen des Notfallbildes „Akute zerebrale Ischämie“ durch den Disponenten der Leitstelle kann eine schwierige Aufgabe sein, gerade wenn unspezifische Beschwerden wie Schwindel, Unwohlsein und Erbrechen im Vordergrund stehen. Standardisierte Abfrage-Schemata sollen genutzt werden, um die Angaben des Meldenden zu strukturieren und die differenzierte Alarmierung von Rettungsmitteln zu unterstützen. Zwar sind Sensitivität und Spezifität einiger gebräuchlicher Instrumente noch nicht optimal [[2](#_ENREF_2)]. Typische Symptom-Bilder wie Paresen und Sprech- oder Sprachstörungen sind aber bereits im Rahmen der standardisierten Notrufabfrage gut erkennbar.

Differenzierte Alarmierungskriterien

Die Empfehlung der Deutschen Schlaganfall-Gesellschaft (DSG) zum standardisierten Vorgehen in der Prähospitalphase des Schlaganfalls empfiehlt nur bei Manifestationen mit Störung der Vitalfunktionen die Alarmierung eines Notarztes [[2](#_ENREF_2), [3](#_ENREF_3)]. Die Entscheidung, welche Einsatzmittel zu entsenden sind, soll generell neben dem klinischen Zustand auch regionale Gegebenheiten wie Eintreff- und Fahrzeiten berücksichtigen. Für jeden Leitstellenbereich sind unter der medizinischen Verantwortung des Ärztlichen Leiters Rettungsdienst (ÄLRD) entsprechende Festlegungen zu treffen.

**Diagnostik und Therapie durch Notarzt und Rettungsdienst**

Das Erkennen der Schlaganfall-Symptome ist der Schlüssel zur korrekten Krankenhauszuweisung des Patienten. Unabhängig davon, ob ärztliches oder nicht-ärztliches Rettungspersonal die Notfallversorgung übernimmt, soll Erfahrung in der Erkennung von Schlaganfall-Symptomen vorliegen. Anamnese und Erstuntersuchung des Patienten sollten neben Angaben zur Vorgeschichte, Dauermedikation (v.a. Antikoagulantien) und Allergien auf spezifische Symptome fokussieren.

Bei der für die Versorgung entscheidenden Bestimmung des letzten sicher symptomfreien Zeitpunktes des Betroffenen kommt dem Rettungsdienst eine Schlüsselposition zu. Dieser Zeitpunkt soll verlässlich dokumentiert werden. Mittels des sog. „Face-Arm-Speech-Test“ (FAST), der auf Paresen der Gesichtsmuskulatur und der oberen Extremität sowie auf Sprachstörungen abzielt, können ca. 80% der zerebralen Ischämien korrekt identifiziert werden. Allerdings weist er eine eher mäßige Spezifität auf [[3](#_ENREF_3)] und erkennt Ischämien im hinteren Stromgebiet nur unzureichend (z.B. Sehstörungen, Doppelbilder, Parästhesien).

Die Pupillomotorik ist bei Eintreffen zu untersuchen und soll im Verlauf überprüft und dokumentiert werden. Eine neu auftretende einseitig weite Pupille ist ein Alarmzeichen und bis zum Beweis des Gegenteils als Symptom einer akuten intrakraniellen Blutung zu werten, die eine unverzügliche Diagnostik und gegebenenfalls operative Entlastung erfordert.

Bei allen Störungen, die mit einer Vigilanzminderung einhergehen, ist die Bestimmung des Blutzuckerwertes obligat. Auf mögliche Begleitsymptome des hypertensiven Schlaganfallpatienten, wie gleichzeitig auftretende kardiale Ischämien mit Endstreckenveränderungen, die bei Patienten mit zerebralen Durchblutungsstörungen nicht selten feststellbar sind, soll besonders geachtet werden. Ein 12-Kanal-EKG soll abgeleitet werden [[4](#_ENREF_4)].

Die häufig auftretenden hypertonen Kreislaufverhältnisse sind als Bedarfshochdruck zu werten, durch den ein ausreichender zerebraler Perfusionsdruck aufrechterhalten werden soll. Die Blutdruck-Senkung hat kontrolliert zu erfolgen, wenn der Blutdruck 220 mmHg systolisch bzw. 120 mmHg diastolisch überschreitet, z.B. durch fraktionierte Gabe von Urapidil. Umgekehrt sollten arterielle Hypotonien (systolischer Blutdruck unter 110 mmHg) nach Ausschluss anderer Ursachen durch zügige Gabe balancierter Vollelektrolyt-Lösungen behandelt werden. Geeignete Katecholamine sollten differenziert erst nach Ausgleich eines Volumenmangels eingesetzt werden [[4](#_ENREF_4)].

Bei einer pulsoximetrisch gemessenen Sauerstoffsättigung von <95% oder klinischen Zeichen einer Hypoxie (Atemnot, beschleunigte Atmung) erfolgt die Gabe von 4L O2/min. Wenn möglich sollten alle Patienten mit einer peripheren Verweilkanüle im nicht paretischen Arm versorgt werden.

**Überflüssige und schädliche therapeutische Maßnahmen**

Die Gabe von gerinnungsaktiven Substanzen (Acetylsalicylsäure oder Heparin) vor Abschluss der bildgebenden Diagnostik ist streng kontraindiziert, da ohne zerebrale Bildgebung eine Unterscheidung zwischen Ischämie und Blutung nicht möglich ist.

Auf den Einsatz nitrathaltiger Präparate, insbesondere als Spray, sollte in der Frühphase verzichtet werden, weil deren Wirkung schlecht steuerbar ist, sie die Autoregulation der Hirngefäße weiter einschränken und damit die Zone der kritischen Perfusion (Penumbra) vergrößern können.

**Einsatztaktik und Zeitmanagement**

Für Patienten mit einer akuten zerebralen Ischämie gelten enge zeitliche Vorgaben: Die Prähospitalzeit vom Anruf in der Leitstelle bis Eintreffen im Krankenhaus sollte so kurz wie möglich sein. Eine telemedizinische Befundübermittlung vom Rettungsdienst in die Klinik kann die Zeit bis zur definitiven Versorgung relevant verkürzen.

Eine Prähospitalzeit bis maximal 60 Minuten bei einem Zielerreichungsgrad von 95% bis zur Übergabe des Patienten an das nächste geeignete Krankenhaus mit zertifizierter Stroke Unit ist akzeptabel [[5](#_ENREF_5)]. In ländlichen Regionen sollte zur Einhaltung dieser Vorgaben frühzeitig der Einsatz eines Rettungshubschraubers erwogen werden. Mit den aufnehmenden Kliniken ist abzustimmen, wie der Umgang mit Angehörigen gestaltet werden sollte. Das bloße Notieren der Telefonnummer reicht häufig nicht aus. Bei vielen Patienten, insbesondere mit Bewusstseinsstörung oder ausgeprägter Sprachstörung, bietet sich die Mitnahme eines Angehörigen in einem Rettungsdienstfahrzeug an, um Entscheidungen für oder gegen z.B. invasive Maßnahmen ohne zeitliche Verzögerung treffen zu können.

Bei Patienten mit Indikation zur mechanischen Thrombektomie soll der Transport von der Stroke Unit in eine neuroradiologische Einrichtung mit Thrombektomiebereitschaft als Notfalltransport erfolgen [[6-8](#_ENREF_6)].

**Geeignetes Krankenhaus**

Die Zielklinik soll über eine zertifizierte Stroke Unit mit 24-Stunden CT-Bereitschaft verfügen.

**Klinische Erstversorgung**

Nach Eintreffen in der Klinik und Durchführung eines CCT soll unverzüglich über die Art der Therapie entschieden werden. Da das Behandlungsergebnis unmittelbar mit der „door-to-needle-time“ korreliert, sollte diese kürzer als 30 Minuten sein („time is brain“), entsprechend einer Zeit von unter 90 Minuten ab Notrufeingang. Deswegen ist es günstig, das CT in unmittelbarer Nähe der Notaufnahme zu lokalisieren und Patienten mit stabilen Vitalparametern direkt auf den CT-Tisch umzulagern [[9](#_ENREF_9)][[9](#_ENREF_9)][[9](#_ENREF_9)][[9](#_ENREF_9), [10](#_ENREF_10)]. Die adäquate Überwachung der Vitalfunktion während der CT-Untersuchung ist sicherzustellen.

Die Zeitvorgaben gelten völlig unabhängig von Zulassungsbeschränkungen der angewendeten Thrombolytika, da im Einzelfall auch nach Überschreitung des sog. „Lyse-Zeitfensters“ eine Therapie durchgeführt wird bzw. ein neuro-interventionelles Verfahren zur Anwendung kommt. Alle Patienten sollten unabhängig von der Schwere der klinischen Symptome rechtzeitig telefonisch in der Zielklinik angemeldet werden [[4](#_ENREF_4)].

**Instrumente des Qualitätsmanagements**

Alle an der Schlaganfallversorgung teilnehmenden Akteure im Rettungsdienst und in den Kliniken sind angehalten, für jeden Patienten strukturiert Qualitätsparameter zu erfassen. Aktuelle Untersuchungen zeigen, dass die Organisation benachbarter Kliniken in einem „Schlaganfall-Netzwerk“ die Versorgungsqualität positiv beeinflusst [[11](#_ENREF_11)]: Durch gezielte Fortbildungsmaßnahmen und die Rückmeldung von Kennzahlen an den Rettungsdienst können Qualitätsindikatoren wie die Thrombolyserate verbessert werden. Daher empfiehlt die Schlaganfall-Leitlinie der DSG die Bildung derartiger Netzwerke ausdrücklich [[4](#_ENREF_4)].

**Literatur**

1. Herdt, J. and M. Karbstein, *Effektivität und Effizienz des Rettungsdienstes in Hessen.* Hessen Agentur Wiesbaden 2009 2009.

2. Krebes, S., et al., *Development and validation of a dispatcher identification algorithm for stroke emergencies.* Stroke, 2012. **43**(3): p. 776-81.

3. Harbison, J., O. Hossain, and D.e.a. Jenkinson, *Diagnostic accuracy of stroke referrals from primary care, emergency room physicians, and ambulance staff using the face arm speech test.* Stroke, 2003. **34**(71–76).

4. Deutsche Gesellschaft für Neurologie. *Akuttherapie des ischämischen Schlaganfalls*, 2012. Herunterladen unter: <http://www.dgn.org/leitlinien-online-2012/inhalte-nach-kapitel/2310-ll-22-2012-akuttherapie-des-ischaemischen-schlaganfalls.html> [letzter Zugriff: 7.7.2015].

5. Ahnefeld, F.W., et al., *Eckpunktepapier zur notfallmedizinischen Versorgung der Bevölkerung in Klinik und Präklinik.* Notfall + Rettungsmedizin, 2008. **11**(6): p. 421-422.

6. Campbell, B.C., et al., *Endovascular therapy for ischemic stroke with perfusion-imaging selection.* N Engl J Med, 2015. **372**(11): p. 1009-18.

7. Goyal, M., et al., *Randomized assessment of rapid endovascular treatment of ischemic stroke.* N Engl J Med, 2015. **372**(11): p. 1019-30.

8. Saver, J.L., et al., *Stent-retriever thrombectomy after intravenous t-PA vs. t-PA alone in stroke.* N Engl J Med, 2015. **372**(24): p. 2285-95.

9. Meretoja, A., et al., *Reducing in-hospital delay to 20 minutes in stroke thrombolysis.* Neurology, 2012. **79**(4): p. 306-13.

10. Bauer de Torres, A., et al., *Reduktion der Door-to-Needle-Zeit durch Patientenübergabe am CT-Tisch – Von der Rettungsliege auf den CT-Tisch.* Aktuelle Neurologie, 2013. **40**(8): p. 462-464.

11. Ziegler, V., et al., *Qualitätsmanagement in der akuten Schlaganfallversorgung: Wie kann man die präklinisch-klinische Schnittstelle beim Schlaganfall bewerten und verbessern? .* Der Notarzt, 2012. **28**(6).
