# Supplementary material for: Eckpunktepapier 2016 zur notfallmedizinischen Versorgung der Bevölkerung in der Prähospitalphase und in der Klinik
Source: Springer Nature journal article supplement (doi:10.1007/s10049-016-0187-0), 2016-07-07
Supplement: MOESM4 [file 10675664]

**Anhang zum Eckpunktepapier 2016**

**Tracerdiagnose *Schwerverletzte/Polytrauma***

U. Schweigkofler1), S. Flohé2), R. Hoffmann1), G. Matthes3), T. Paffrath4), C. Wölfl5), M. Fischer6,7,*), E. Kehrberger6,8,*), H. Marung9,10,*), Hp. Moecke(†)10,*), S. Prückner11,*), H. Trentzsch11,*), B. Urban11,*) und Fachexperten der Eckpunktepapier- Konsensus-Gruppe

1) Unfallchirurgie und Orthopädische Chirurgie, BG Unfallklinik Frankfurt am Main gGmbH, Frankfurt am Main

2) Klinik für Unfallchirurgie, Orthopädie und Handchirurgie, Städtisches Klinikum Solingen gemeinnützige GmbH, Solingen

3) Klinik für Unfallchirurgie und Orthopädie, Unfallkrankenhaus Berlin, Berlin

4) Klinik für Unfallchirurgie, Orthopädie & Sporttraumatologie, Lehrstuhl für Unfallchirurgie & Orthopädie, Klinikum der Privaten Universität Witten/Herdecke, Köln

5) Klinik für Orthopädie, Unfallchirurgie und Sporttraumatologie, Krankenhaus Hetzelstift, Neustadt/Weinstraße

6) Arbeitsgemeinschaft Südwestdeutscher Notärzte e.V. (agswn), Filderstadt

7) Klinik für Anästhesiologie, Operative Intensivmedizin, Notfallmedizin und Schmerztherapie, Klinik am Eichert, Göppingen

8) Klinik für Anästhesiologie und operative Intensivmedizin, Kreiskliniken Esslingen – Paracelsus-Krankenhaus, Ruit

9) Institut für Rettungs- und Notfallmedizin, Universitätsklinikum Schleswig-Holstein, Campus Kiel, Kiel

10) Institut für Notfallmedizin (IfN), Asklepios Klinikum Harburg, Hamburg

11) Institut für Notfallmedizin und Medizinmanagement (INM), Klinikum der Universität München, Ludwig-Maximilians-Universität, München

*) Core Group, in alphabetischer Reihenfolge

**Einführung / Vorbemerkung**

In Deutschland verunfallen jährlich rund 8 Millionen Menschen im häuslichen Umfeld, bei der Arbeit, bei Freizeitaktivitäten oder im Straßenverkehr [[1](#_ENREF_1)]. Aktuelle Analysen zeigen, dass in Deutschland jährlich mit etwa 18.200 bis 18.400 Schwerverletzte mit einem Injury Severity Score (ISS) ≥16 Punkte zu rechnen ist [[2](#_ENREF_2)]. Bei einer Mortalität von 10% stellt das Polytrauma nach wie vor die häufigste Todesursache in der Altersgruppe bis 40 Jahre dar.

**Prozessqualität Leitstelle**

Die Alarmierungsgrundlage sollte der NA-Indikationskatalog der BÄK sein. Durch eine strukturierte Abfrage sollte der Disponent Informationen zur Unfallkinematik bzw. zum Mechanismus erheben. Eine situationsbezogene frühe Alarmierung der Rettungsmittel unter Einbeziehung der Luftrettung [[3](#_ENREF_3)] und Allokation der Patienten in ein dem Verletzungsmuster entsprechend geeignetem Krankenhaus wirkt sich positiv auf das Outcome aus. Zeitverzögerungen durch Nachalarmierungen bei offenkundigem Bedarf an sekundär angeforderten Rettungsmitteln soll vermieden werden. Um die Entscheidungsfähigkeit des Disponenten zu verbessern sollte dieser eine spezifische Ausbildung/Training erhalten.

**Diagnostik und Therapie durch Notarzt und Rettungsdienst**

An der Einsatzstelle soll die Situation schnell erfasst werden, um eine Gefährdung des Patienten und auch der Einsatzkräfte (Eigenschutz) auszuschließen. Eine umfassende Einschätzung seines Zustandes soll erfolgen, um den kritisch verletzten Patienten zuverlässig zu erkennen. Bestimmte lebensbedrohliche Zustände sind häufig schon ohne aufwendige technische Diagnostik erkennbar. Der Analyse des Unfallmechanismus kommt hierbei im Hinblick auf mögliche Verletzungsfolgen eine enorme Bedeutung zu.

Lebensbedrohliche Zustände und Verletzungen sollen schnell erkannt und prioritätengesteuert, dem Leitspruch: „behandle als erstes, was als erstes tötet“ folgend [[4](#_ENREF_4)], gemäß den Empfehlungen der gültigen S3-Leitlinie Polytrauma/Schwerverletztenversorgung [[5](#_ENREF_5)] behandelt werden.

Grundsätzlich sollte jeder schwerverletzte Patient im Rahmen der präklinischen Versorgung das folgende Maßnahmenbündel erhalten [[6](#_ENREF_6)]:

- - - 1. Sicherstellen eines freien Atemweges
      2. Klinische Untersuchung des Thorax und Sicherstellen der Atemfunktion
      3. Blutungskontrolle und Anlage geeigneter Gefäß-Zugänge
      4. Erfassung von Bewusstseinslage, Motorik und Sensibilität
      5. Wärmeerhalt sicherstellen, Ruhigstellung der Wirbelsäule und verletzter Extremitäten sowie Versorgung von Wunden

Die detaillierte Darstellung aller empfohlenen Therapiemaßnahmen ist für die heterogene Gruppe der Schwerverletzten im Rahmen dieser Empfehlung nicht vollumfänglich möglich. Bedürfnisse wie z.B. differenzierte Infusionstherapie und eine angepasste Schmerztherapie/ Narkose sollten vom Notarzt dem individuellen Bedarf des Patienten angepasst werden. Einsatzkräfte sollten in den erforderlichen Maßnahmen und Entscheidungsprozessen in speziellen Ausbildungsprogrammen unterwiesen und trainiert werden.

**Einsatztaktik und Zeitmanagement**

Gerade bei der Schwerverletztenversorgung ist der Zeitfaktor wesentlich [[7](#_ENREF_7)]. Schwere Blutungen durch stumpfe, insbesondere aber durch penetrierende Verletzungen [[8](#_ENREF_8)] sowie schwere Schädelhirntraumata (SHT) [[9](#_ENREF_9)] können in kürzester Zeit nach dem Unfallereignis zur kritischen Vitalbedrohung [[10](#_ENREF_10)] werden, die eine umgehende operative Therapie erforderlich machen. Gerade unter präklinischen Bedingungen können lebensbedrohliche Hämorrhagien bzw. schwere SHT nicht mit hinreichender diagnostischer Sicherheit identifiziert und nicht kausal therapiert werden. Da solche Verletzungen potentiell bei jedem Patienten mit einem entsprechenden Unfallereignis vorliegen können, müssen konsequenter Weise alle diese Patienten so schnell wie möglich einer definitiven Versorgung im geeigneten Krankenhaus zugeführt werden [[7](#_ENREF_7)].

Zur Vermeidung einer verlängerten Prähospitalzeit sollte man sich an der Einsatzstelle auf die notwendigen Maßnahmen am Patienten beschränken und die benötigten Rettungsmittel auch im Hinblick auf die erforderliche Transportlogistik (einschließlich Luftrettung) für die Erreichung des geeigneten Krankenhauses vorausschauend alarmieren.

Schwerverletzte Patienten/Polytrauma sollen höchstens 60 Minuten nach Notrufeingang im geeigneten Krankenhaus aufgenommen werden.

**Geeignetes Krankenhaus**

Das geeignete Krankenhaus ist ein zertifiziertes Traumazentrum im TraumaNetzwerk DGU® gemäß den Empfehlungen im Weißbuch Schwerverletztenversorgung der DGU [[11](#_ENREF_11)] und den Empfehlungen der S3-Leitlinie [[5](#_ENREF_5)]. Nach Möglichkeit sollte der schwerverletzte Patient primär in ein überregionales oder regionales Traumazentrum transportiert werden. Um aber regional bestehenden Besonderheiten in der Krankenhausverteilung gerecht zu werden, sollen die Zuweisungskriterien im jeweiligen Traumanetzwerk erörtert und festgelegt werden.

**Klinische Erstversorgung**

Polytrauma/Schwerverletzte sollen über den Schockraum aufgenommen werden. Maßgeblich für die Schockraumalarmierung ist die Einschätzung des prähospital behandelnden Teams. In der S3-Leitlinie Polytrauma/ Schwerverletztenversorgung finden sich Aktivierungskriterien für den Schockraum, die sich an den Empfehlungen des Center for Disease Control (CDC) orientieren und die geeignet sind um Patienten mit einem hohen Gefährdungspotential für schwere Verletzungen zu identifizieren [[5](#_ENREF_5), [12](#_ENREF_12)]. Die Versorgung im Schockraum soll prioritätenorientiert vorgenommen werden und folgt den Prinzipen, die in der S3-Leitlinie [[5](#_ENREF_5)] beschreiben sind. Falls erforderlich soll im geeigneten Krankenhaus innerhalb von 90 Minuten nach Notrufeingang mit einer lebensrettenden Notfalloperation begonnen werden können.

**Instrumente des Qualitätsmanagements**

Örtliche Qualitätszirkel stellen die Basis eines Qualitätsmanagementprozesses dar. Die Einbindung des Rettungsdienstes ist als erstes Glied der Behandlungskette notwendig. Weiterhin können Treffen mit Vertretern der an einem zertifizierten Traumanetzwerk beteiligten Krankenhäuser und dem Rettungsdienst dazu beitragen, Probleme in den Schnittstellenbereichen sowohl zwischen Rettungsdienst und Krankenhaus als auch interhospital (Verlegung innerhalb der Traumanetzwerkstrukturen) zu reduzieren.

Die verpflichtende Dateneingabe von präklinischen und klinischen Daten schwerverletzter Patienten durch zertifizierte Traumazentren in das TraumaRegister DGU® der Deutschen Gesellschaft für Unfallchirurgie generiert einen umfassenden Datenpool [[13](#_ENREF_13)] und soll den teilnehmenden Krankenhäuser und dem Rettungsdienst als externes Qualitätsmanagementinstrument dienen.

**Literatur**

1. Bundesanstalt für Arbeitsschutz und Arbeitsmedizin (BAuA). *Unfallstatistik: Unfalltote und Unfallverletzte 2011 in Deutschland*, 2013. Herunterladen unter: <http://www.baua.de/de/Informationen-fuer-die-Praxis/Statistiken/Unfaelle/Gesamtunfallgeschehen/Gesamtunfallgeschehen.html> [letzter Zugriff: 15.12.2015].

2. Debus, F., et al., *Anzahl der Schwerverletzten in Deutschland.* Dtsch Arztebl International, 2015. **112**(49): p. 823-9.

3. Gries, A., et al., *Praklinische Versorgungszeiten bei Einsatzen der Luftrettung. Einfluss der Dispositionsstrategie der Rettungsleitstelle.* Anaesthesist, 2014. **63**(7): p. 555-62.

4. American College of Surgeons Committee on Trauma, ed. *Advanced Trauma Life Support (ATLS) Student Course Manual*. 9th ed. 2012, American College of Surgeons: Chicago, IL, United States of America.

5. Deutsche Gesellschaft für Unfallchirurgie. *S3 – Leitlinie Polytrauma/Schwerverletzten-Behandlung*, 2011. Herunterladen unter: <http://www.awmf.org/leitlinien/detail/ll/012-019.html> [letzter Zugriff: 15.12.2015].

6. Matthes, G., et al., *Wesentliche Massnahmen zur prahospitalen Versorgung schwerverletzter Patienten: Das Trauma Care Bundle.* Unfallchirurg, 2015. **118**(8): p. 652-6.

7. Wyen, H., et al., *The golden hour of shock - how time is running out: prehospital time intervals in Germany--a multivariate analysis of 15, 103 patients from the TraumaRegister DGU(R).* Emerg Med J, 2013. **30**(12): p. 1048-55.

8. Clarke, J.R., et al., *Time to laparotomy for intra-abdominal bleeding from trauma does affect survival for delays up to 90 minutes.* J Trauma, 2002. **52**(3): p. 420-5.

9. Tien, H.C., et al., *Reducing time-to-treatment decreases mortality of trauma patients with acute subdural hematoma.* Ann Surg, 2011. **253**(6): p. 1178-83.

10. Sauaia, A., et al., *Epidemiology of trauma deaths: a reassessment.* J Trauma, 1995. **38**(2): p. 185-93.

11. Deutsche Gesellschaft für Unfallchirurgie, *Weißbuch Schwerverletztenversorgung, 2. erweiterte Auflage - Empfehlungen zur Struktur, Organisation und Ausstattung der Schwerverletztenversorgung in der Bundesrepublik Deutschland.* Orthopädie und Unfallchirurgie Mitteilung und Nachrichten, 2012(Supplement 1): p. 4-34.

12. Trentzsch, H., B. Urban, and S. Huber-Wagner, *Evidenzbasierte Triage von verletzten Patienten am Unfallort.* Notfall + Rettungsmedizin, 2012. **15**(ger).

13. Lefering, R. and T. Paffrath, *Versorgungsrealitat auf der Basis der Daten des TraumaRegister DGU(R).* Unfallchirurg, 2012. **115**(1): p. 30-2.
