# Supplementary material for: Eckpunktepapier 2016 zur notfallmedizinischen Versorgung der Bevölkerung in der Prähospitalphase und in der Klinik
Source: Springer Nature journal article supplement (doi:10.1007/s10049-016-0187-0), 2016-07-07
Supplement: MOESM5 [file 10675664]

**Anhang zum Eckpunktepapier 2016**

***Tracerdiagnose Sepsis***

F. Brunkhorst1), M. Fischer2,3,*), E. Kehrberger2,4,*), H. Marung5,6,*), Hp. Moecke(†)6,*), S. Prückner 7,*), H. Trentzsch7,*), B. Urban7,*) und Fachexperten der Eckpunktepapier- Konsensus-Gruppe

1) Klinik für Anästhesiologie und Intensivtherapie, Universitätsklinikum Jena, Jena

2) Arbeitsgemeinschaft Südwestdeutscher Notärzte e.V. (agswn), Filderstadt

3) Klinik für Anästhesiologie, Operative Intensivmedizin, Notfallmedizin und Schmerztherapie, Klinik am Eichert, Göppingen

4) Klinik für Anästhesiologie und operative Intensivmedizin, Kreiskliniken Esslingen – Paracelsus-Krankenhaus, Ruit

5) Institut für Rettungs- und Notfallmedizin, Universitätsklinikum Schleswig-Holstein, Campus Kiel, Kiel

6) Institut für Notfallmedizin (IfN), Asklepios Klinikum Harburg, Hamburg

7) Institut für Notfallmedizin und Medizinmanagement (INM), Klinikum der Universität München, Ludwig-Maximilians-Universität, München

*) Core Group, in alphabetischer Reihenfolge

**Einführung / Vorbemerkung**

Sepsis, landläufig oft als „Blutvergiftung“ bezeichnet, ist eine komplexe systemische inflammatorische Reaktion des Körpers auf eine Infektion. Sepsis, schwere Sepsis und septischer Schock definieren ein Krankheitskontinuum, welches sich klinisch mit unterschiedlicher zeitlicher Dynamik manifestieren kann [1]. Sepsis ist eine häufige und oft unterschätzte Erkrankung [2]. Eine frühzeitige Diagnose und Therapieeinleitung verbessern die sonst hohe Sterblichkeit deutlich [3-6].

Da das klinische Bild je nach zugrundeliegender Infektion und individuellen Risikofaktoren hochvariabel ist und die diagnostischen Kriterien über eine Vielzahl von veränderten Vitalparametern, Laborwerten und Organfunktionen definiert sind ist es schwer, die Sepsis insbesondere im frühen ambulanten Verlauf zuverlässig zu erkennen [1, 7]. Entsprechend ist es für den Notarzt- und Rettungsdienst wichtig, ein situationsangepasstes Bewusstsein im Umgang mit Sepsis zu entwickeln, damit bei Verdacht auf Sepsis über die Schnittstellen zwischen den Behandlungsteams hinaus Diagnostik und Therapie so schnell wie möglich eingeleitet werden können.

**Prozessqualität Leitstelle**

Die Sepsis ist im Rahmen des Notrufes nicht eindeutig von anderen Krankheitsbildern abgrenzbar. Schildert der Anrufer Symptome wie neu aufgetretene Verwirrtheit, Agitation, schwere Beeinträchtigung des Allgemeinbefindens oder Apathie, so sollte der Disponent fragen, ob der Patient Fieber hat oder ob sich der Patient „heiß“ anfühlt oder Schüttelfrost hat/hatte. Wird das bejaht, sollte der „V.a. Sepsis“ geäußert werden und der Alarm mit diesem Einsatzstichwort versehen werden. Die Alarmierung erfolgt nach üblichen Kriterien für den Notfalleinsatz mit RTW bzw. Notarzt-Einsatz gemäß Notarzt-Indikationskatalog.

**Diagnostik durch Notarzt und Rettungsdienst**

Die Diagnose und Differentialdiagnose der Sepsis erfordert große ärztliche Erfahrung. Eine Sepsis sollte bei Erwachsenen angenommen werden, wenn zwei oder mehr Kriterien der Liste „Anhalt für systemische Entzündungsreaktion“ vorliegen (**Box 1**) und aufgrund von Anamnese (**Box 2**) und/oder körperlicher Untersuchung (**Box 4**) klinische Zeichen für eine Infektion oder der Verdacht auf eine Infektion bestehen. Besonderen Risikofaktoren, die für eine Sepsis begünstigend wirken; sollte dabei besondere Beachtung entgegengebracht werden (**Box 3**). Die Kriterien und Grenzwerte dieser Empfehlung berücksichtigt die begrenzten diagnostischen Möglichkeiten im Notarzt- und Rettungsdienst und orientiert sich an den sonst üblichen Definitionen [7, 8].

Nachdem die Sepsis klinisch schwer zu erkennen ist, sollten umgekehrt aber auch immer die jeweiligen Differenzialdiagnosen in Betracht gezogen werden.

**Therapie durch Notarzt und Rettungsdienst**

Im Rahmen der präklinischen Versorgung sollen alle Patienten mit/oder V.a. auf Sepsis eine Basistherapie einschließlich Sauerstoffgabe bekommen und schnellstmöglich in ein geeignetes Krankenhaus transportiert werden. Bei begleitender Hypotension sollte eine forcierte intravenöse Flüssigkeitstherapie mit kristalloider Lösung (30ml/kg KG) begonnen werden [9].

Das Ziel der Infusionstherapie ist die Normalisierung der Kreislaufparameter mit einem MAP ≥65 mmHg [8]. Als pragmatischer Surrogatparameter soll ein systolischer Blutdruck ≥100mmHg angestrebt werden [10].

Bei der Übergabe sollte dem weiterbehandelnden Team der „V.a. Sepsis“ mitgeteilt werden.

Es liegen widersprüchliche Daten über den Nutzen einer präklinisch eingeleiteten Antibiotikatherapie vor. Wegen der begrenzten Möglichkeiten, vor dem Start der Therapie Blutkulturen oder andere mikrobiologische Proben zur Erreger- und Resistenzbestimmung zu gewinnen, sollte gegenwärtig auf eine präklinisch begonnene Antibiotikagabe außerhalb kontrollierter Studien verzichtet werden.

**Einsatztaktik und Zeitmanagement**

Patienten mit V.a. Sepsis sollen spätestens 60 Minuten nach Eingang des Notrufs im geeigneten Krankenhaus eintreffen. Je nach Zustand des Patienten ist eine Vorankündigung sinnvoll; ggf. ist es erforderlich, den Patienten mit akuter Vitalbedrohung für den Schockraum anzumelden.

**Geeignetes Krankenhaus**

Das geeignete Krankenhaus verfügt über eine rund um die Uhr einsatzbereite Notaufnahme, eine Intensivstation, ein rund um die Uhr einsatzbereites CT und Labor und hat außerdem Möglichkeiten zur Sanierung des Infekt-Fokus mit entsprechender fachspezifischer Qualifikation.

**Klinische Erstversorgung**

Die Deutsche Sepsis-Gesellschaft (DSG) und die Deutsche Interdisziplinäre Vereinigung für Intensiv- und Notfallmedizin (DIVI) haben in der S2k-Leitlinie „Prävention, Diagnose, Therapie und Nachsorge der Sepsis“ Behandlungsempfehlungen der schweren Sepsis und des septischen Schocks publiziert [8]. Es wurde auch gezeigt, dass die frühzeitige Einleitung der Maßnahmen des Surviving Sepsis Campaign (SSC) Resuscitation Bundles [9] mit einer Senkung der Sterblichkeit [3-6], Verminderung der Erkrankungsschwere [5] und Reduktion der Behandlungskosten sowie der Schonung von Gesundheitsressourcen (z.B. Intensivkapazität) [3, 6] assoziiert ist. Die bereits in der prähospitalen Phase angelaufenen Maßnahmen sollten daher im Krankenhaus fortgesetzt und entsprechend erweitert werden.

Mit dem Empfehlungsgrad 1C wird der Beginn einer antibiotischen Therapie innerhalb der ersten Stunde empfohlen [8, 9, 11]. Es zeigt sich aber auch, dass dieses Ziel in der Realität oft nicht erreicht werden kann. Daher wird für das entsprechende Maßnahmenbündel ein Zeitfenster von bis zu 180 Minuten eingeräumt. Bei einer Prähospitalzeit von 60 Minuten kann die verbleibende Zeit von insgesamt 120 Minuten (180 Minuten ab Notruf) als ausreichend betrachtet werden, um die zeitgerechte Einleitung weiterer Maßnahmen sicherzustellen [5, 9, 12]. Für das Eckpunktepapier schlagen wir aus pragmatischen Gründen als Zielmarke für die Einleitung der weiteren Maßnahmen des Resuscitation-Bündels einschließlich Diagnostik und mikrobiologischer Probenentnahme einen Zeitraum von höchstens 90 Minuten ab Notruf vor. Dies beinhaltet die Abnahme von mindestens 2-3 Paar Blutkulturen (aerob und anaerob) und ggf. Entnahme von weiteren geeigneten Proben zur mikrobiologischen Untersuchung bevor die empirische Antibiotikatherapie gestartet wird. Ist eine Probengewinnung in diesem Zeitrahmen nicht möglich, so soll bei Verdacht auf Sepsis auch ohne Probenentnahme innerhalb von 120 Minuten ab Aufnahme (bzw. 180 Minuten ab Notruf) mit einer empirischen Antibiotikatherapie begonnen werden.

Zur Diagnose des Schocks und zur Erfolgskontrolle der Schocktherapie soll die Messung des Serumlaktatwertes vorgenommen werden. Bei erhöhten Serumlaktatwerten muss eine Optimierung der Hämodynamik erfolgen, so dass sich die Serumlaktatwerte schnell normalisieren können. Als wichtige Kausaltherapie ist die zügige Sanierung des Infektfokus zu nennen. Zeitgleich erfolgt zunächst eine kalkulierte – später eine an die mikrobiologischen Befunde angepasste - antiinfektive Therapie. [1, 8, 9].

**Instrumente des Qualitätsmanagements**

Ein Register aus prähospital und innerklinisch erhobenen Daten über die Prozesszeiten, Maßnahmen, Infektfokus, Keimspektrum, Ressourcenverbrauch und Outcome könnte helfen, die Versorgungsqualität bei der Sepsis weiter zu optimieren[[1]](#footnote-1). Die Analysen der Registerdaten sollten für die Prozessoptimierung auch dem Notarzt- und Rettungsdienst zugänglich gemacht werden. In diesem Zusammenhang ist es wünschenswert, dass Rettungsdienste von der Klinik ein Feedback bezüglich der Genauigkeit ihrer Verdachtsdiagnosen erhalten.

Box 1: „Anhalt für systemische Entzündungsreaktion“

- Atemfrequenz ≥20/min
- Systolischer Blutdruck (RRsys) <90mmHg
- Verwirrtheit
- Herzfrequenz ≥90/min
- Blutzucker >140 mg/dL bzw. 7,8 mmol/l (ohne vorbestehenden Diabetes)
- Körpertemperatur ≥38,0 °C (=Fieber) oder ≤36°C (=Hypothermie)[[2]](#footnote-2)
- Pulsoxymetrische Sauerstoffsättigung ≤90%

**Box 2: Hinweise auf Infektion in der Anamnese**

- Pneumonie: Husten und Auswurf, Dyspnoe, atemabhängiger Thoraxschmerz
- Intraabdominale Infektion: Durchfall, Bauchschmerzen, Operationen
- Harnwegsinfekt: Brennen beim Wasserlassen, auffälliger Geruch,

Verfärbung des Urins

- Weichteil- und Knocheninfektion: Chronische Wunden, Gelenk- und Wirbelsäulenschmerzen, Rötung, Bewegungseinschränkung
- Fremdkörper-assoziierte Infekte: Chemotherapie (z.B. Portkatheter), Inkontinenz (Dauerkatheter), Operationen (z.B. Prothese, Herzklappe, Herzschrittmacher, AICD, sonstige Fremdkörper), Körperschmuck (z. B. Piercing)
- Meningitis: Nackensteifigkeit, Kopfschmerz, veränderte Bewusstseinslage
- Endokarditis: Rhythmusstörungen, Klappenersatz

**Box 3: Hinweise für Risikofaktoren/prädisponierende Erkrankungen in der Anamnese**

- Therapien, die Resistenz gegenüber Infektionen herabsetzen (z.B. Immunsuppression, Chemotherapie, Bestrahlung, Steroiddauertherapie etc. Erkrankung, die das Immunsystem stark beeinträchtigen (z.B. Leukämie, Lymphome, AIDS, Z.n. Splenektomie)
- Diabetes mellitus, chronische Dialyse, Leberzirrhose
- Krankenhausaufenthalt in den letzten 30 Tagen

**Box 4: Hinweise für Infektion in der körperlichen Untersuchung**

- ZNS: verwirrt, agitiert, desorientiert, delirant, Nackensteifigkeit
- Thorax: Auskultation (z.B. Rasselgeräusche, Herzgeräusche), Rötung, inspiratorischer Schmerz
- Schock: Hypotonie (RRsys <90 mmHg), Zentralisierung, Rekapillarisierungszeit vermindert (>2 Sekunden)
- Gerinnung: Petechien, Ekchymosen
- Abdomen: Druckschmerz, Loslassschmerz, Narben, Rötung
- Extremitäten: Überwärmung, Rötung, Schwellung, Gelenkerguss, Narben

**Literatur**

1. Angus, D.C. and T. van der Poll, *Severe sepsis and septic shock.* N Engl J Med, 2013. **369**(9): p. 840-51.

2. Engel, C., et al., *Epidemiology of sepsis in Germany: results from a national prospective multicenter study.* Intensive Care Med, 2007. **33**(4): p. 606-18.

3. Cannon, C.M., et al., *The GENESIS project (GENeralized Early Sepsis Intervention Strategies): a multicenter quality improvement collaborative.* J Intensive Care Med, 2013. **28**(6): p. 355-68.

4. Chamberlain, D.J., E.M. Willis, and A.B. Bersten, *The severe sepsis bundles as processes of care: a meta-analysis.* Aust Crit Care, 2011. **24**(4): p. 229-43.

5. Miller, R.R., 3rd, et al., *Multicenter implementation of a severe sepsis and septic shock treatment bundle.* Am J Respir Crit Care Med, 2013. **188**(1): p. 77-82.

6. Noritomi, D.T., et al., *Implementation of a multifaceted sepsis education program in an emerging country setting: clinical outcomes and cost-effectiveness in a long-term follow-up study.* Intensive Care Med, 2014. **40**(2): p. 182-91.

7. Levy, M.M., et al., *2001 SCCM/ESICM/ACCP/ATS/SIS International Sepsis Definitions Conference.* Crit Care Med, 2003. **31**(4): p. 1250-6.

8. Reinhart, K., et al. *Prävention, Diagnose, Therapie und Nachsorge der Sepsis - 1. Revision der S-2k Leitlinien der Deutschen Sepsis-Gesellschaft e.V. (DSG) und der Deutschen Interdisziplinären Vereinigung für Intensiv- und Notfallmedizin (DIVI)*, [PDF-File],2010. Herunterladen unter: <http://www.awmf.org/leitlinien/detail/ll/079-001.html> [letzter Zugriff: 5.6.2014].

9. Jones, A.E. and M.A. Puskarich, *The Surviving Sepsis Campaign guidelines 2012: update for emergency physicians.* Ann Emerg Med, 2014. **63**(1): p. 35-47.

10. Asfar, P., et al., *High versus low blood-pressure target in patients with septic shock.* N Engl J Med, 2014. **370**(17): p. 1583-93.

11. Dellinger, R.P., et al., *Surviving Sepsis Campaign: international guidelines for management of severe sepsis and septic shock, 2012.* Intensive Care Med, 2013. **39**(2): p. 165-228.

12. Villar, J., et al., *Many emergency department patients with severe sepsis and septic shock do not meet diagnostic criteria within 3 hours of arrival.* Ann Emerg Med, 2014. **64**(1): p. 48-54.

# Post Skriptum (27.6.2016)

Die Empfehlung zur Tracerdiagnose Sepsis im Eckpunktepapier 2016 basiert auf Empfehlungen aus dem Jahre 1992 und 2001 zur Definition diagnostischer Kriterien [1, 2]. Dieser Konsensus und insbesondere die darin formulierten SIRS-Kriterien galten von jeher als unspezifisch. Im Februar 2016 veröffentlichte eine internationale Task-Force mit SEPSIS-3 eine neue Empfehlung von diagnostischen Kriterien der Sepsis [3].

SEPSIS-3 definiert Sepsis als lebensbedrohliche Organdysfunktion, die Folge einer fehlregulierten Antwort des Körpers auf eine Infektion ist [3]. Die Organdysfunktion wird dabei am Sequential [Sepsis-Related] Organ Failure Assessment-(SOFA) Score festgemacht. Als klinisches Kriterium soll bei akuter Veränderung des Gesamt-SOFA Scores von 2 oder mehr Punkten im Zusammenhang mit einer Infektion eine Sepsis erwogen werden. Die Krankenhaus-Mortalität dieser Patienten beträgt selbst bei nur moderater Organdysfunktion über 10%. Damit ist die Definition Sepsis viel komplexer geworden, weshalb SIRS, schwere Sepsis und die Vorstellung eines Krankheitskontinuums nun wegfallen [3].

Der septische Schock, der nur eine Teilmenge der Sepsis-Patienten mit besonders schwerer Störung der Zirkulation und des Stoffwechsels charakterisiert, wird definiert als Sepsis mit persistierender Hypotension, bei der zur Aufrechterhaltung eines MAP von mehr als 65°mmHG Vasopressoren erforderlich sind UND bei der ein Serum-Laktat-Spiegel >2 mmol/L trotz adäquater Volumengabe vorliegt. Die Sterblichkeit gegenüber der Sepsis ist erhöht (>40%) [3].

Für die Prähospitalphase ist der SOFA-Score wenig praktikabel. Der quick SOFA-Score (qSOFA) ist ein einfaches Screening-Tool zur Anwendung in Präklinik und Notaufnahme, das ohne Labordiagnostik auskommt und eine Sepsis ähnlich gut vorhersagt wie der SOFA-Score. Patienten mit Verdacht auf eine Infektion sollten daher mit dem qSOFA gescreent werden. Die Kriterien und zugehörigen Schwellenwerte sind Tabelle 1 zu entnehmen. Bei einem qSOFA ≥2 Punkte sollte nach Aufnahme in der Klinik so schnell wie möglich mit Hilfe des SOFA-Scores das weitere Ausmaß der Organdysfunktion untersucht werden.

Weder SOFA noch qSOFA sind als alleinige Diagnosekriterien zu sehen. Sind weniger als 2 Kriterien erfüllt obwohl ein hinreichender Verdacht auf eine Infektion besteht, sollte die weitere Diagnostik und Therapie nicht verzögert werden.

Die SIRS-Kriterien (insbesondere Fieber oder Leukozytose) aber auch andere unspezifische Symptome (z.B. Blutzuckerentgleisungen), wie sie aus den bisherigen Sepsis-Definition bekannt sind, und die auch in den diagnostischen Kriterien für eine Sepsis in das Eckpunktepapier eingegangen sind, behalten somit auch weiterhin Bedeutung als allgemeiner Hinweis auf das Vorhandensein einer Infektion, während spezifische Symptome der jeweiligen Infektion die Aufmerksamkeit gezielt auf den anatomischen Fokus oder den auslösenden Mikroorganismus lenken (z.B. Husten und Auswurf bei Pneumonie oder Dysurie bei Harnwegsinfekten). Anamnese und körperlicher Untersuchungsbefund bleiben damit zentraler Bestandteil der Diagnostik. Die Grundlagen dieser Überlegungen sind in den Boxen 2 und 3 der Empfehlung zur Sepsis bereits richtig beschrieben.

Als Folge neuer wissenschaftlicher Erkenntnisse haben sich die, in der Empfehlungen genannten diagnostischen Kriterien (Box 1: ANHALT FÜR SYSTEMISCHE ENTZÜNDUNGSREAKTION) relevant geändert. Alle anderen Empfehlungen zum Umgang mit dieser Tracerdiagnose gelten aber trotzdem weiter wie beschreiben. Der Grund dafür, dass die neue Definition nicht mehr in das Papier eingearbeitet wurde liegt darin, dass damit der bereits abgeschlossene Konsensusprozess neu hätte aufgerollt werden müssen. Auf der anderen Seite sollte aber die Veröffentlichung nicht weiter verzögert werden.

Somit empfehlen die Fachexperten, die die Tracerdiagnose Sepsis formuliert haben folgende Änderungen zu beachten: Die BOX 1: „ANHALT FÜR SYSTEMISCHE ENTZÜNDUNGSREAKTION“ soll in der medizinischen Praxis ersetzt werden durch den qSOFA-Score (Tabelle 1).

*H. Trentzsch*

*F. M. Brunkhorst*

*B. Urban*

*S. Prückner*

| **Tabelle 1.** Kriterien des qSOFA-Scores | | |
| --- | --- | --- |
| **Kriterium** | **Schwellenwert** | **Punkt** |
| Jede Änderung des Bewusstseinszustandes | GCS < 15 Punkte  oder jede Veränderung zum *Status ante* | 1 |
| Beschleunigte Atemfrequenz | AF > 22/min | 1 |
| Niedriger Blutdruck | RR sys < 100 mmHg | 1 |

Bei Patienten mit 2 oder mehr Punkten im qSOFA-Score soll nach einem Infektfokus gefahndet werden. Bei einem qSOFA von >2 Punkten ist die Hospitalsterblichkeit 3-14fach höher als bei einem qSOFA Score von <2 Punkten. Die Box 2 (Hinweise auf Infektion in der Anamnese) und Box 3 (Hinweise für Risikofaktoren/prädisponierende Erkrankungen in der Anamnese) gelten dafür uneingeschränkt weiter. Unspezifische Symptome eines Infektes, insbesondere das Messen der Körpertemperatur in den Grenzen ≥38,0 °C (=Fieber) oder ≤36°C (=Hypothermie, vor allem bei alten Patienten) sollen für die diagnostische Entscheidung, ob ein Infekt vorliegt beachtet werden!

**Zusätzliche Literatur**

1. Levy, M.M., et al., 2001 SCCM/ESICM/ACCP/ATS/SIS International Sepsis Definitions Conference. Crit Care Med, 2003. 31(4): p. 1250-6.

2. Bone, R.C., et al., Definitions for sepsis and organ failure and guidelines for the use of innovative therapies in sepsis. The ACCP/SCCM Consensus Conference Committee. American College of Chest Physicians/Society of Critical Care Medicine. Chest, 1992. 101(6): p. 1644-55.

3. Singer, M., et al., The Third International Consensus Definitions for Sepsis and Septic Shock (Sepsis-3). JAMA, 2016. 315(8): p. 801-10.

1. Beispiele hierfür sind AlertsNet (http://www.alertsnet.de/) und SAPFIRE (<http://www.sapfire-registry.org/>). des Universitätsklinikums Jena [↑](#footnote-ref-1)
2. Insbesondere ältere Patienten können trotz Sepsis dennoch Körpertemperaturen <38°C aufweisen. [↑](#footnote-ref-2)
