# Supplementary material for: Eckpunktepapier 2016 zur notfallmedizinischen Versorgung der Bevölkerung in der Prähospitalphase und in der Klinik
Source: Springer Nature journal article supplement (doi:10.1007/s10049-016-0187-0), 2016-07-07
Supplement: MOESM6 [file 10675664]

**Anhang zum Eckpunktepapier 2016**

***Tracerdiagnose ST-Hebungsinfarkt (STEMI[[1]](#footnote-2))***

K.H. Scholz1), D. Andresen2), M. Fischer3,4,*), E. Kehrberger2,5,*), H. Marung6,7,*), Hp. Moecke(†)7,*), S. Prückner 8,*), H. Trentzsch8,*), B. Urban8,*) und Fachexperten der Eckpunktepapier- Konsensus-Gruppe

1) Klinik für Kardiologie und Internistische Intensivmedizin - Medizinische Klinik I, St. Bernward Krankenhaus GmbH, Hildesheim

2) Kardiologie an der Evangelischen Elisabeth Klinik, Berlin Mitte, Berlin

3) Arbeitsgemeinschaft Südwestdeutscher Notärzte e.V. (agswn), Filderstadt

4) Klinik für Anästhesiologie, Operative Intensivmedizin, Notfallmedizin und Schmerztherapie, Klinik am Eichert, Göppingen

5) Klinik für Anästhesiologie und operative Intensivmedizin, Kreiskliniken Esslingen – Paracelsus-Krankenhaus, Ruit

6) Institut für Rettungs- und Notfallmedizin, Universitätsklinikum Schleswig-Holstein, Campus Kiel, Kiel

7) Institut für Notfallmedizin (IfN), Asklepios Klinikum Harburg, Hamburg

8) Institut für Notfallmedizin und Medizinmanagement (INM), Klinikum der Universität München, Ludwig-Maximilians-Universität, München

*) Core Group, in alphabetischer Reihenfolge

**Einführung / Vorbemerkung**

Die koronare Herzkrankheit (KHK) ist weltweit die häufigste Todesursache. In Deutschland verstarben im Jahr 2011 mehr als 50.000 Menschen am akuten Herzinfarkt. Die Krankenhaussterblichkeit des STEMI liegt nach aktuellen Daten bei bis zu 12% [[1](#_ENREF_1), [2](#_ENREF_2)]. Auch die Folgeerkrankungen nach STEMI - wie Herzinsuffizienz und Rhythmusstörungen - sind von erheblicher medizinischer und ökonomischer Bedeutung. Es sind somit maximale Anstrengungen zur Verbesserung der Patientenversorgung in der Akuttherapie und der Sekundärprävention des STEMI notwendig.

**Prozessqualität Leitstelle**

In der Notfallversorgung des STEMI kommt es im Wesentlichen auf zwei Dinge an: die schnelle Diagnose und den schnellstmöglichen Transport in ein Krankenhaus mit einsatzbereitem Herzkatheterlabor (PCI[[2]](#footnote-3)-Bereitschaft).

Diese Ziele lassen sich u.a. durch die rasche Disposition der richtigen Rettungsmittel und die schnelle Zuweisung an eine geeignete Klinik erreichen. Hierfür ist das zuverlässige Erkennen der Notfallsituation durch die Leitstelle notwendig. Eine strukturierte Abfrage soll die sichere Erkennung typischer als auch atypischer Symptome des Herzinfarktes unterstützen. Zu den typischen Zeichen zählt insbesondere der akut aufgetretene starke Thoraxschmerz, häufig in Kombination mit Übelkeit und/oder Luftnot. Gerade bei weiblichen Patienten können jedoch auch atypische Symptome wie neu aufgetretener, starker Schwindel, oftmals begleitet von Bauch- oder Rückenschmerzen im Vordergrund stehen. Die Notarztindikation ist hierbei jeweils gegeben, u.a. wegen der Gefährlichkeit und den möglichen schwerwiegenden Komplikationen des akuten Myokardinfarktes, aber auch wegen der potentiell lebensbedrohlichen Differentialdiagnosen. Aus diesem Grund ist eine weitere Differenzierung bei der Alarmierung nicht zielführend. Notarzt und RTW sind zeitgleich zu alarmieren.

**Diagnostik und Therapie durch Notarzt und Rettungsdienst**

Notarzt und Rettungsdienst sind für die STEMI-Versorgung von herausragender Bedeutung. Der Notarzt soll zügig nach medizinischem Erstkontakt die Diagnose des Herzinfarktes mittels Anamnese, klinischem Zustandsbild, 12-Kanal-EKG und differentialdiagnostischer Abwägung stellen und die notwendige medikamentöse Therapie einleiten.

Basierend auf Diagnose, Schwere des Krankheitsbildes und den Absprachen innerhalb der Herzinfarktnetzwerke sollte der Notarzt beim STEMI Thrombozytenaggregationshemmer, Heparin, eine bedarfsangepassten Analgesie, eine antiarrhythmischen Therapie sowie ggf. eine Volumen- und Katecholamintherapie durchführen [[3](#_ENREF_3)].

Gemeinsam bewerkstelligen Notarzt und Rettungsdienst den schnellen Transport des Patienten unter kontinuierlichem Monitoring (EKG, Blutdruck und SpO2) und Fortführen der Therapie in das geeignete PCI-Krankenhaus zur definitiven Behandlung.

Das Personal des Rettungsdienstes muss nach den Leitlinien in der Lage sein, ein EKG zu registrieren und zu interpretieren oder zu transmittieren. Auf jedem Rettungsmittel sollen ein 12-Kanal-EKG-Gerät und ein Defibrillator-System zur Verfügung stehen, da bei einem Herzinfarkt jederzeit lebensbedrohliche Rhythmusstörungen auftreten können.

Entsprechend dieser Anforderungen soll das Rettungsdienstfachpersonal in der STEMI-Diagnostik als auch im Basic Life Support (BLS) geschult sein. Der Notarzt soll darüber hinaus den STEMI sicher diagnostizieren können und im Advanced Life Support (ALS) ausgebildet sein.

**Einsatztaktik und Zeitmanagement**

Oberstes Behandlungsprinzip ist es, durch eine schelle Revaskularisierung des Myokards - bevorzugt mittels PCI - den ischämisch bedingten Untergang von Herzmuskelgewebe zu verhindern. Jede Zeitverzögerung bei der Revaskularisierung bedeutet potentiell ein schlechteres Behandlungsergebnis für den Patienten und soll daher strikt vermieden werden. Eine telemedizinische Befundübermittlung vom Rettungsdienst in die Klinik kann die Zeit bis zur definitiven Versorgung relevant verkürzen.

Die Akut-PCI soll 60 bis spätestens 90 Minuten nach Notrufeingang erfolgen. Das Katheterlabor sollte im Vorfeld umgehend informiert werden. Dabei sollte ein direktes Gespräch zwischen Notarzt und dem verantwortlichen Kardiologen im Zielkrankenhaus erfolgen. Wenn die Akut-PCI nicht innerhalb von 120 Minuten durchführbar ist, sollte spätestens 30 Minuten nach Erstkontakt eine Thrombolysetherapie durch den Notarzt eingeleitet werden und die PCI darauffolgend durchgeführt werden [[4](#_ENREF_4)].

Die primäre Einweisung des Patienten in ein PCI-Krankenhaus ist wegen der Zeitvorgaben zwingend erforderlich. Eine mögliche Unterversorgung des Rettungsdienstbereiches soll planerisch vom Träger des Rettungsdienstes durch entsprechende Vorhaltemaßnahmen unter Einbeziehung der Luftrettung verhindert werden.

**Geeignetes Krankenhaus**

Das geeignete Krankenhaus verfügt über ein Herzkatheterlabor, das Interventionen jederzeit (24 h und 365 Tage) innerhalb von 20 Minuten durchführen kann. Darüber hinaus sind u.a. ein Schnelllabor zur Infarktdiagnostik und eine Intensivstation erforderlich.

**Klinische Erstversorgung**

Die Diagnose des ST-Hebungsinfarktes stützt sich auf das klinische Bild, die typischen EKG-Veränderungen (ST-Elevationen oder neu aufgetretener Linksschenkelblock) und entsprechende laborchemische Befunde. Die Infarktdiagnose soll 10 Minuten nach Eintreffen des Notarztes/Rettungsdienstes anhand der o.g. Kriterien gestellt werden [[4](#_ENREF_4)]. Mit der schon präklinisch getroffenen Diagnose eines STEMI können die intrahospitalen Abläufe deutlich beschleunigt werden, sie ist also die Basis für die Einleitung einer zeitnahen Reperfusionstherapie. STEMI Patienten sollten nach den neuen Leitlinien möglichst unter Umgehung der Notaufnahme, einer Coronary-Care-Unit oder Intensivstation vom Notarzt- und Rettungsdienst direkt in das Herzkatheterlabor gebracht werden.

**Instrumente des Qualitätsmanagements**

Bezugnehmend auf die Leitlinien scheint eine flächendeckende Umsetzung der o.g. Zeitvorgaben am besten in regionalen Herzinfarktnetzwerken, welche über ein rund um die Uhr verfügbares zentrales PCI-Krankenhaus, mehrere umgebende Nicht-PCI-Kliniken und einen funktionstüchtigen Notarzt- und Rettungsdienst verfügen. Für die optimale Notfallversorgung ist die gesamte Rettungskette entscheidend. Die Kommunikation von der Leitstelle über den Rettungsdienst bis hin zum PCI-Krankenhaus muss sicher funktionieren. Das Gesamtsystem soll anhand eines sektorübergreifenden Ablauf-Protokolls gut trainiert sein. Flächendeckend für Deutschland sollte innerhalb der Netzwerke – entsprechend der Leitlinien - eine überprüfbare Qualitätssicherung erfolgen. Alle Behandlungszeiten sollen erfasst werden, die Behandlungsergebnisse müssen dokumentiert werden und es sollen regelhaft Maßnahmen zur Optimierung veranlasst werden [[5](#_ENREF_5)], wie es zum Beispiel im FITT-STEMI Projekt umgesetzt wird [[6](#_ENREF_6)].

**Literatur**

1. Freisinger, E., et al., *German nationwide data on current trends and management of acute myocardial infarction: discrepancies between trials and real-life.* Eur Heart J, 2014. **35**(15): p. 979-88.

2. Zeymer, U., et al., *Kommentar zu den Leitlinien der Europäischen Gesellschaft für Kardiologie (ESC) zur Therapie des akuten Herzinfarkts bei Patienten mit ST-Streckenhebung (STEMI).* Der Kardiologe 2013. **7**(6): p. 410-422

3. Arntz, H.R., et al., *2010 GRC - Teil 05 - Initiales Management des akuten Koronarsyndroms.* Notfall + Rettungsmedizin, 2010. **13**(7): p. 621-634.

4. Steg, P.G., et al., *ESC Guidelines for the management of acute myocardial infarction in patients presenting with ST-segment elevation.* Eur Heart J, 2012. **33**(20): p. 2569-619.

5. Scholz, K.H., et al., *Contact-to-balloon time and door-to-balloon time after initiation of a formalized data feedback in patients with acute ST-elevation myocardial infarction.* Am J Cardiol, 2008. **101**(1): p. 46-52.

6. Scholz, K.H., et al., *Reduction in treatment times through formalized data feedback: results from a prospective multicenter study of ST-segment elevation myocardial infarction.* JACC Cardiovasc Interv, 2012. **5**(8): p. 848-57.

1. ST-segment elevation myocardial infarction [↑](#footnote-ref-2)
2. Perkutane koronare Intervention (percutaneous coronary intervention) [↑](#footnote-ref-3)
