# Supplementary material for: Eckpunktepapier 2016 zur notfallmedizinischen Versorgung der Bevölkerung in der Prähospitalphase und in der Klinik
Source: Springer Nature journal article supplement (doi:10.1007/s10049-016-0187-0), 2016-07-07
Supplement: MOESM7 [file 10675664]

**Anhang zum Eckpunktepapier 2016**

**Tracerdiagnose Reanimation bei *plötzlichem Kreislaufstillstand***

J.-T. Gräsner1), M. Fischer2,3,*), E. Kehrberger2,4,*), H. Marung1,5,*), Hp. Moecke(†)5,*), S. Prückner 6,*), H. Trentzsch6,*), B. Urban6,*) und Fachexperten der Eckpunktepapier- Konsensus-Gruppe

1)Institut für Rettungs- und Notfallmedizin, Universitätsklinikum Schleswig-Holstein, Campus Kiel, Kiel

2) Arbeitsgemeinschaft Südwestdeutscher Notärzte e.V. (agswn), Filderstadt

3) Klinik für Anästhesiologie, Operative Intensivmedizin, Notfallmedizin und Schmerztherapie, Klinik am Eichert, Göppingen

4) Klinik für Anästhesiologie und operative Intensivmedizin, Kreiskliniken Esslingen – Paracelsus-Krankenhaus, Ruit

5) Institut für Notfallmedizin (IfN), Asklepios Klinikum Harburg, Hamburg

6) Institut für Notfallmedizin und Medizinmanagement (INM), Klinikum der Universität München, Ludwig-Maximilians-Universität, München

*) Core Group, in alphabetischer Reihenfolge

**Einführung/Vorbemerkung:**

Der „plötzliche Kreislaufstillstand“ ist das Krankheitsbild, bei dem jede Minute Verzögerung über Leben und Tod entscheidet. Im Rettungsdienst Deutschlands werden mehr als 100.000 unerwartete Todesfälle pro Jahr beobachtet. Die Inzidenz beträgt 120 bis 200 pro 100.000 Einwohner und Jahr [[1](#_ENREF_1), [2](#_ENREF_2)]. Jedoch wird nicht jeder Patient so rechtzeitig vom Notarzt- und Rettungsdienst erreicht, dass eine Reanimation auch begonnen wird. Die Reanimationsinzidenz beträgt deshalb 30-90 pro 100.000 Einwohner im Jahr [[3](#_ENREF_3), [4](#_ENREF_4)].

Die Reanimationsbehandlung kann nur erfolgreich sein, wenn alle Glieder der Rettungskette optimal ineinander greifen [[5](#_ENREF_5)]. Die Laienreanimation nimmt eine wichtige Sonderstellung ein, da sie das therapiefreie Intervall relevant verkürzt, jedoch nur eingeschränkt vom Rettungsdienst organisiert werden kann. Die Ausbildung von Schülern und Laien in lebensrettenden Sofortmaßnahmen muss daher als eine vordringliche gesellschaftliche Aufgabe gesehen werden [[6](#_ENREF_6), [7](#_ENREF_7)]. Die Wahrscheinlichkeit, einen Herz-Kreislaufstillstand unbeschadet zu überleben, nimmt ohne Therapie pro Minute um ca. 10 Prozent ab. Die vor Jahren u.a. von der Bundesärztekammer definierte Hilfsfrist von 10 min für 80% der Patienten ist daher in vielen Fällen nicht ausreichend [[8](#_ENREF_8)]. Darüber hinaus wird diese - medizinisch unzureichende - Vorgabe nur in 30% der Rettungsdienste in Deutschland erfüllt. Hier besteht also dringender Handlungsbedarf. Im Interesse der Patienten sollte die Hilfsfrist von 8 min zwischen „Notrufeingang“ und „Ankunft der ersten organisierten Helfer, die ausgebildet und ausgestattet sind, um eine effektive Herz-Lungen-Wiederbelebung unverzüglich und selbständig zu beginnen“, in der Regel in 80% der Fälle eingehalten werden. Der Notarzt sollte spätestens 4 min nach Beginn der ersten rettungsdienstlichen Maßnahmen am Einsatzort aktiv werden. Hilfsfrist und Erreichungsgrad sollen deshalb erfasst und von den Aufsichtsbehörden kontrolliert werden.

**Prozessqualität Leitstelle**

Der Leitstelle kommt eine lebensentscheidende Rolle bei der Versorgung von Patienten mit einem Herz-Kreislaufstillstand zu. Die Notrufabfrage soll standardisiert erfolgen, um den Herz-Kreislaufstillstand sicher erkennen, Notarzt und Rettungsdienst schnell alarmieren und umgehend eine „Telefonreanimation“ mit dem Ersthelfer beginnen zu können [[9-11](#_ENREF_9)]. Die Telefonreanimation soll entsprechend hinterlegter Protokolle erfolgen. Ein Qualitätsmanagement dieser Prozesse soll erfolgen.

**Diagnostik und Therapie durch Notarzt und Rettungsdienst**

Die initiale Diagnostik beim Herz-Kreislaufstillstand folgt den aktuellen ERC-Leitlinien [[5](#_ENREF_5), [12](#_ENREF_12), [13](#_ENREF_13)]. Neben der Feststellung des Kreislauf-Stillstandes anhand von Bewusstlosigkeit und fehlender oder nicht normaler Atmung folgt die Differenzierung in defibrillierbare (Kammerflimmern/pulslose ventrikuläre Tachykardie (VF/pVT)) und nicht defibrillierbare Rhythmen (Asystolie/pulslose elektrische Aktivität (PEA)). Während der Reanimation sollen EKG, Sauerstoffsättigung und Kapnographie kontinuierlich erfasst werden. Die Ableitung eines 12-Kanal EKGs nach Wiederherstellung eines Eigenkreislaufes (ROSC) zur Erkennung eines ST-Hebungsinfarktes soll durchgeführt werden. Die Übertragung des EKGs in das Zielkrankenhaus kann regional sinnvoll sein.

Die Therapie des Herz-Kreislaufstillstands folgt den aktuellen ERC-Leitlinien [[5](#_ENREF_5), [12](#_ENREF_12), [13](#_ENREF_13)]. Die wichtigste Basismaßnahme ist die Durchführung von optimierten Thoraxkompressionen. Parallel wird die Oxygenierung durch Ventilation sichergestellt. Als Goldstandard gilt weiter die endotracheale Intubation, wenn der Anwender entsprechend trainiert ist. Unterbrechungen der Thoraxkompressionen sollen auf jeden Fall minimiert werden. Ein Gefäßzugang soll umgehend etabliert werden (iv oder intraossär). Adrenalin zur Steigerung der myokardialen Reperfusion wird bei Asystolie/PEA früher eingesetzt als bei VF/pVT. Amiodaron ist indiziert bei persistierendem VF/pVT.

Parallel zu den Basis- und erweiterten Maßnahmen der Reanimation erfolgt nach notärztlicher Diagnose die Therapie der reversiblen Ursachen. Dies soll, je nach Ursache, das Atemwegsmanagement bei Hypoxie, die Elektrolytsubstitution, die Volumentherapie, die Entlastung einer Herz-Beutel-Tamponade oder eines Spannungspneumothorax, die Antidot-Therapie oder die thrombolytische Therapie sein. Nach Wiederherstellung eines Spontankreislaufs (ROSC) soll der Notarzt unmittelbar mit der Post-Reanimationstherapie beginnen. Hierzu zählen hämodynamische Optimierung mit einer bedarfsgerechten Flüssigkeits- und Katecholamintherapie, das Temperaturmanagement und ggf. eine Analgosedierung und Narkose.

Ein automatisches Thoraxkompressions-System sollte beim Transport unter laufender Reanimation und bei prolongierter Reanimation insbesondere bei reversiblen Ursachen verwendet werden [[14](#_ENREF_14)]. Hingegen zeigen aktuelle Studien keinen Vorteil dieser Systeme für einen routinemäßigen Einsatz im Vergleich mit guter manueller Thoraxkompression [[15-18](#_ENREF_15)].

**Einsatztaktik und Zeitmanagement**

Beim Herz-Kreislaufstillstand ist das therapiefreie Intervall nach Kollaps die entscheidende Determinante für die Überlebenswahrscheinlichkeit und die Überlebensqualität. Der Notarzt- und Rettungsdienst soll dieses Intervall durch die Telefonreanimation und kurze Hilfsfristen verkürzen. Die Leitstelle soll den Herz-Kreislaufstillstand sicher erkennen und den Anrufer/Laien zur Telefonreanimation anleiten. Das Krankenhaus sollte spätestens 60 Minuten nach dem ersten medizinischen Kontakt erreicht werden, um die Kausaltherapie des möglicherweise zugrundeliegenden Herzinfarktes nach spätestens 90 Minuten beginnen zu können. Ein Transport unter fortlaufender CPR kann in seltenen Fällen indiziert sein, wenn die geeignete Kausaltherapie im Krankenhaus das Leben des Patienten retten kann. Zu diesem Transport sollten Thoraxkompressions-Systeme verwendet werden. Die Auswahl des Transportmittels erfolgt anhand der vermuteten Transportzeit.

**Geeignetes Krankenhaus**

Nach primär erfolgreicher Reanimation sollte die Weiterversorgung der Patienten im nächsten geeigneten Krankenhaus erfolgen, welches unmittelbar und jederzeit über die Möglichkeit zur kardiologischen Katheter-Intervention, CT-Untersuchung, therapeutischen Hypothermie/zielgerichtetem Temperaturmanagement und zur standardisierten Intensivtherapie verfügt [[19](#_ENREF_19), [20](#_ENREF_20)]. Ein derart spezialisiertes Krankenhaus könnte zukünftig die Bezeichnung Cardiac-Arrest-Center erhalten.

**Klinische Erstversorgung**

In der geeigneten Klinik soll eine standardisierte Post-Reanimationsbehandlung inklusive des Temperaturmanagements durchgeführt werden [[21](#_ENREF_21), [22](#_ENREF_22)]. Für reanimierte Patienten mit akutem ST-Hebungsinfarkt (STEMI) oder Trauma sollen Ablaufprotokolle verwendet werden.

Bei reanimierten Patienten besteht bei Vorliegen eines Myokardinfarktes die Möglichkeit zur Kausaltherapie. Ein großer Teil der reanimierten Patienten mit akutem Myokardinfarkt befindet sich bei Eintreffen im Krankenhaus im kardiogenen Schock. Generell sollte bei Patienten mit STEMI eine zeitnahe Wiedereröffnung des verschlossenen Kranzgefäßes durchgeführt werden, um die Prognose entscheidend zu verbessern [[23](#_ENREF_23), [24](#_ENREF_24)]. Hierfür ist ein strukturierter Ablauf erforderlich mit dem Ziel der Direktübergabe der Patienten im Katheterlabor. Entscheidend dabei sind die frühe Diagnosestellung durch den Notarzt mittels 12-Kanal-EKG bereits unmittelbar nach ROSC und eine sofortige Infarktankündigung in der Zielklinik. Entsprechend der Empfehlungen bei STEMI Patienten sollen auch CPR-Patienten innerhalb von 90 bis 120 Minuten nach rettungsdienstlichem Erstkontakt im Herzkatheterlabor [[25](#_ENREF_25)] behandelt werden. Hierfür sollen verbindliche Netzwerkstrukturen - analog der Trauma-Netzwerke – entwickelt und zertifiziert werden.

**Instrumente des Qualitätsmanagements**

Die Behandlungsergebnisse nach „plötzlichem Kreislaufstillstand“ können durch den Notarzt- und Rettungsdienst nur durch ein umfassendes Qualitätsmanagement nachhaltig verbessert werden. Zu diesem Zweck sollen der gesamte Prozess und die Überlebensraten - beginnend mit der Leitstelle bis zur Versorgung in der Zielklinik - dokumentiert und allen Beteiligten kontinuierlich transparent dargestellt werden [[26](#_ENREF_26)].

Als etabliertes Instrument zur Qualitätssicherung für die Reanimationsbehandlung steht das Deutsche Reanimationsregister zur Verfügung [[26](#_ENREF_26), [27](#_ENREF_27)]. Innerhalb der Teilnehmer des Deutschen Reanimationsregisters haben sich Netzwerke zur Qualitätssicherung und Versorgungsforschung gebildet, in denen die eigenen Ergebnisse mit anderen verglichen werden können. Kennzahlen zur Stärken- und Schwächenanalyse des Notarzt- und Rettungsdienstes stehen mit Prozesszeiten, Maßnahmenkatalogen und differenzierter Darstellung der Ergebnisqualität zum Selbst- oder Fremdaudit zur Verfügung [[6](#_ENREF_6), [26](#_ENREF_26), [28](#_ENREF_28)]. Für eine bessere Patientenversorgung sollte die Teilnahme z. B. am Deutschen Reanimationsregister für Rettungs- und Notarztdienste verpflichtend werden.

Darüber hinaus sollten Echtzeit-Feedbacksysteme verwendet werden, da diese Geräte im realen Einsatzfall helfen, Kompressionsfrequenz und Drucktiefe zu optimieren [[29](#_ENREF_29)]. Feedbacksysteme reduzieren die No-Flow-Zeit und können die Überlebensraten steigern. Im Sinne eines Debriefings sollen diese Einsatzdaten auch für nachfolgende Teambesprechungen genutzt werden [[29-31](#_ENREF_29)].

Um 10.000 Leben in Deutschland nach „plötzlichem Kreislaufstillstand“ retten zu können, wurden in den Bad Boller Reanimationsgesprächen folgende Ziele definiert [[4](#_ENREF_4), [32](#_ENREF_32), [33](#_ENREF_33)]:

1. Hilfsfristerreichung[[1]](#footnote-2) von >80% innerhalb von 8 Minuten,
2. Inzidenz von begonnenen Reanimationsmaßnahmen von >80 pro 100.000 Einwohner und Jahr,
3. ROSC Rate / RACA[[2]](#footnote-3)-ROSC Verhältnis >1,
4. Klinikaufnahmerate >50%,
5. Klinikentlassungsrate mit gutem neurologischen Ergebnis >16%,
6. Entlassungsinzidenz von >10 Patienten/100.000 Einwohner/Jahr,
7. Erkennungsrate eines Kreislaufstillstandes in den Leitstellen bei >90%,
8. Notarztnachforderungsquote[[3]](#footnote-4) <10%,
9. Anteil der Telefon-CPR bei Herz-Kreislaufstillstand >80%.

Diese Ziele sind als herausfordernd, aber realisierbar zu klassifizieren, da sie in den besten Notarzt- und Rettungsdiensten in Deutschland schon heute erreicht werden.

**Literatur**

1. Arntz, H.R., et al., Diurnal, weekly and seasonal variation of sudden death. Population-based analysis of 24,061 consecutive cases. European heart journal, 2000. 21(4): p. 315-20.

2. Fischer, M., N.J. Fischer, and J. Schuttler, One-year survival after out-of-hospital cardiac arrest in Bonn city: outcome report according to the 'Utstein style'. Resuscitation, 1997. 33(3): p. 233-43.

3. Berdowski, J., et al., Global incidences of out-of-hospital cardiac arrest and survival rates: Systematic review of 67 prospective studies. Resuscitation, 2010. 81(11): p. 1479-87.

4. Neukamm, J., et al., The impact of response time reliability on CPR incidence and resuscitation success: a benchmark study from the German Resuscitation Registry. Crit Care, 2011. 15(6): p. R282.

5. Monsieurs, K.G., et al., European Resuscitation Council Guidelines for Resuscitation 2015: Section 1. Executive summary. Resuscitation, 2015. 95: p. 1-80.

6. Gräsner, J., et al., Einfluss der Basisreanimationsmaßnahmen durch Laien auf das Überleben nach plötzlichem Herztod. Notfall Rettungsmed, 2012. 15(7): p. 593-599.

7. Hossfeld B, L.D., Szepannek M, Seewald S, Müller M, Wnent J, Geldner G, Werner C, Friedrich K, Hackstein A, Bohn A, Beckers SK, Braun J, Leben retten ist cool These 2 – Die Wiederbelebung durch Laien muss eine Selbstverständlichkeit sein. Notfall Rettungsmed, 2014. 17: p. 319-320.

8. Ahnefeld, F.W., Grundlagen und Grundsätze zur Weiterentwicklung der Rettungsdienste und der notfallmedizinischen Versorgung der Bevölkerung in der Bundesrepublik Deutschland. Anästhesiologie & Intensivmedizin, 1998. 39(5): p. 255-261.

9. Berdowski, J., et al., Importance of the first link: description and recognition of an out-of-hospital cardiac arrest in an emergency call. Circulation, 2009. 119(15): p. 2096-102.

10. Hackstein A, v.K.F., Beckers SK, Bohn A, Gliwitzky B, Hossfeld B, Kanz KG, Kreimeier U, Lemke H, Lohs T, Prückner S, Marung H, Die Leitstelle beeinflusst den Ausgang der Wiederbelebung entscheidend These 9 – Die telefonische Anleitung zur Wiederbelebung muss flächendeckend verfügbar sein. Notfall Rettungsmed, 2014. 17: p. 333-335.

11. Hardeland, C., et al., Comparison of Medical Priority Dispatch (MPD) and Criteria Based Dispatch (CBD) relating to cardiac arrest calls. Resuscitation, 2014. 85(5): p. 612-6.

12. Soar, J., et al., European Resuscitation Council Guidelines for Resuscitation 2015: Section 3. Adult advanced life support. Resuscitation, 2015. 95: p. 100-47.

13. Perkins, G.D., et al., European Resuscitation Council Guidelines for Resuscitation 2015: Section 2. Adult basic life support and automated external defibrillation. Resuscitation, 2015. 95: p. 81-99.

14. Fischer, M., et al., Mechanische Reanimationshilfen. Der Anaesthesist, 2014. 63(3): p. 186-97.

15. Perkins, G.D., et al., Mechanical versus manual chest compression for out-of-hospital cardiac arrest (PARAMEDIC): a pragmatic, cluster randomised controlled trial. The Lancet, 2014.

16. Rubertsson, S., et al., Mechanical chest compressions and simultaneous defibrillation vs conventional cardiopulmonary resuscitation in out-of-hospital cardiac arrest: the LINC randomized trial. Jama, 2014. 311(1): p. 53-61.

17. Smekal, D., et al., CPR-related injuries after manual or mechanical chest compressions with the LUCAS device: A multicentre study of victims after unsuccessful resuscitation. Resuscitation, 2014.

18. Wik, L., et al., Manual vs. integrated automatic load-distributing band CPR with equal survival after out of hospital cardiac arrest. The randomized CIRC trial. Resuscitation, 2014.

19. Kill, C., et al., Die spezialisierte Krankenhausbehandlung nach erfolgreicher Wiederbelebung ist überlebenswichtig. These 8 - Diese Patienten müssen in spezialisierten Krankenhäusern (Cardiac-Arrest-Zentren) behandelt werden. Notfall + Rettungsmedizin, 2014. 17(4): p. 331–332.

20. Nolan, J.P., et al., European Resuscitation Council and European Society of Intensive Care Medicine Guidelines for Post-resuscitation Care 2015: Section 5 of the European Resuscitation Council Guidelines for Resuscitation 2015. Resuscitation, 2015. 95: p. 202-22.

21. Fischer, M., Die Postreanimationsbehandlung (Post Resuscitation Care), in Reanimation - Empfehlungen für die Wiederbelebung, Bundesärztekammer, Editor. 2011, Deutscher Ärzte-Verlag: Köln. p. 159-173.

22. Tomte, O., et al., Strong and weak aspects of an established post-resuscitation treatment protocol-A five-year observational study. Resuscitation, 2011. 82(9): p. 1186-93.

23. Scholz, K.H., et al., Reduction in treatment times through formalized data feedback: results from a prospective multicenter study of ST-segment elevation myocardial infarction. JACC Cardiovasc Interv, 2012. 5(8): p. 848-57.

24. Scholz, K.H., et al., Prozessentwicklung in der Herzinfarktversorgung: Netzwerkbildung, Telemetrie und standardisiertes Qualitatsmanagement mit systematischer Ergebnisruckkopplung.

. Herz, 2008. 33(2): p. 102-9.

25. Steg, P.G., et al., ESC Guidelines for the management of acute myocardial infarction in patients presenting with ST-segment elevation. Eur Heart J, 2012. 33(20): p. 2569-619.

26. Fischer M, M.M., Wnent J, Seewald S, Bohn A, Jantzen T, Gräsner JT Deutsches Reanimationsregister der DGAI. Notfall Rettungsmed, 2013. 16: p. 251–259

27. Gräsner, J., et al., Deutsches Reanimationsregister : Wissenschaft und Reanimationsforschung. Anaesthesist, 2014.

28. Gräsner, J., et al., ROSC after cardiac arrest--the RACA score to predict outcome after out-of-hospital cardiac arrest. European heart journal, 2011. 32(13): p. 1649-56.

29. Lukas, R.P., et al., Chest compression quality management and return of spontaneous circulation: a matched-pair registry study. Resuscitation, 2012. 83(10): p. 1212-8.

30. Couper, K., et al., Debriefing to improve outcomes from critical illness: a systematic review and meta-analysis. Intensive care medicine, 2013. 39(9): p. 1513-23.

31. Wolfe, H., et al., Interdisciplinary ICU cardiac arrest debriefing improves survival outcomes*. Critical care medicine, 2014. 42(7): p. 1688-95.

32. Gräsner, J., et al., Optimierung der Reanimationsversorgung in Deutschland Bad Boller – Reanimationsgespräche 2014 – 10 Thesen für 10.000 Leben. Notfall Rettungsmed, 2014. 17: p. 314–316.

33. Messelken, M., et al., Ohne Daten kein messbarer Fortschritt. These 6 – Jede Wiederbelebung muss im Deutschen Reanimationsregister vollständig erfasst werden. Notfall Rettungsmed, 2014. 17: p. 327-328.

1. siehe Glossar [↑](#footnote-ref-2)
2. RACA: **R**OSC **a**fter **c**ardiac **a**rrest, Score zum Benchmarking der Ergebnisqualität nach präklinischer Reanimation [↑](#footnote-ref-3)
3. Anteil der Nachforderungen eines Notarztes an allen Einsätzen ohne ursprüngliche Notarztbeteiligung [↑](#footnote-ref-4)
