# Supplementary material for: Eckpunktepapier 2016 zur notfallmedizinischen Versorgung der Bevölkerung in der Prähospitalphase und in der Klinik
Source: Springer Nature journal article supplement (doi:10.1007/s10049-016-0187-0), 2016-07-07
Supplement: MOESM8 [file 10675664]

**Anhang zum Eckpunktepapier 2016**

**Pädiatrische Aspekte bei der präklinischen Versorgung der Tracerdiagnosen**

T. Nicolai1), F. Hoffmann1), M. Fischer2,3,*), E. Kehrberger2,4,*), H. Marung5,6,*), Hp. Moecke(†)6,*), S. Prückner7,*), H. Trentzsch7,*), B. Urban7,*) und Fachexperten der Eckpunktepapier- Konsensus-Gruppe

1) Kinderintensivstation, Kinderklinik und Kinderpoliklinik im Dr. von Haunerschen Kinderspital, Klinikum der Universität München, Ludwig-Maximilians-Universität, München

2) Arbeitsgemeinschaft Südwestdeutscher Notärzte e.V. (agswn), Filderstadt

3) Klinik für Anästhesiologie, Operative Intensivmedizin, Notfallmedizin und Schmerztherapie, Klinik am Eichert, Göppingen

4) Klinik für Anästhesiologie und operative Intensivmedizin, Kreiskliniken Esslingen – Paracelsus-Krankenhaus, Ruit

5) Institut für Rettungs- und Notfallmedizin, Universitätsklinikum Schleswig-Holstein, Campus Kiel, Kiel

6) Institut für Notfallmedizin (IfN), Asklepios Klinikum Harburg, Hamburg

7) Institut für Notfallmedizin und Medizinmanagement (INM), Klinikum der Universität München, Ludwig-Maximilians-Universität, München

*) Core Group, in alphabetischer Reihenfolge

**Vorbemerkung:**

Diese Anlage zum Eckpunktepapier 2016 ist eine inhaltliche Ergänzung zu den bisher im Eckpunktepapier berücksichtigten Notfällen Schädelhirntrauma, Schlaganfall, Schwerverletzte/Polytrauma, Sepsis, ST-Hebungsinfarkt und Reanimation bei plötzlichem Kreislaufstillstand. Sie enthält ergänzende Anmerkungen aus kinder-notfallmedizinischer Sicht und komplettiert so die Empfehlungen des Eckpunktepapiers für alle Altersgruppen der Bevölkerung einschließlich Kinder im Alter 0 bis 14 Jahre. Die Versorgung von Geburten und Neugeborenen ist nicht Gegenstand dieser Pathways.

**Schädelhirntrauma**

Die Empfehlung zum Schädelhirntrauma (SHT) steht in enger Beziehung zur Empfehlung für schwerverletzte Kinder. Für die prähospitale Versorgung ergeben sich daher keine anderslautenden Empfehlungen.

Das SHT steht von der Häufigkeit der Verletzungen bei Kindern noch weiter im Vordergrund als beim Erwachsenen und bestimmt maßgeblich die Mortalität und Morbidität.

Eine sofortige Bildgebung mittels CT (in Zukunft evtl. alternativ MRT) ist bei entsprechender klinischer Symptomatik sofort notwendig. Daher soll bei der Bestimmung der Transportwege immer ein Krankenhaus mit der Möglichkeit zur sofortigen Intervention beim Kind (Verlaufs-CCT, Trepanation, evtl. Anlage Hirndrucksonde) erfolgen. Um bei bestimmten, weniger schweren Fällen keine zu häufigen CT-Indikationen zu stellen und dadurch unnötige Strahlendosen einzusparen, sollen die PECARN-Kriterien zur Indikationsstellung herangezogen werden [[1](#_ENREF_1), [2](#_ENREF_2)]. Sollte eine Primärversorgung in einem Haus ohne Kinderklinik erfolgen, so muss eine vorher etablierte Verfahrensweise zur Weiterverlegung an eine Kinderabteilung oder Kinderklinik mit Kinderchirurgie und Kinderintensivstation bestehen.

**„Pediatric Stroke“ – Schlaganfall im Kindesalter**

Im Vergleich zu den Erwachsenen ist der kindliche Schlaganfall deutlich seltener, in Deutschland sind pro Jahr ca. 300-500 Kinder betroffen. Aktuelle Studien zeigen, dass nicht jeder kindlicher Schlaganfall sofort als solcher erkannt und behandelt wird. Weniger als 10% der Kinder werden innerhalb von 3h versorgt und bei 50% der Kinder wird der Schlaganfall primär nicht als solcher erkannt [[3](#_ENREF_3)].

Der Schlaganfall beim Kind ist jedoch in der Ätiologie sehr verschieden vom Erwachsenen-Schlaganfall. Die Vielzahl an kinderspezifischen Differential­diagnosen erfordert zeitnahe standardisierte Diagnostik und Therapie im interdisziplinären Team aus Kinderneurologen, Kinderintensivmediziner, Kinderhämostaseologen und Kinder-Neuroradiologen.

Die Symptomatik ist ähnlich wie bei Erwachsenen: Hemiparese, Aphasie, Krampfanfälle, Visusstörungen, Bewusstseinsstörung usw. Diagnostik und Therapie durch den Rettungsdienst/Notarzt unterscheiden sich nicht vom Erwachsenen.

Auch im Kindesalter bestimmt wie im Erwachsenenalter die frühzeitige Versorgung des akuten Schlaganfalls das Outcome.

Bei der präklinischen Versorgung des kindlichen Schlaganfalls heißt Ziel der präklinischen Einsatztaktik und des Zeitmanagements je schneller desto besser. Daher sollen Patienten so schnell wie möglich in die Pediatric Stroke Unit oder eine Kinderklinik mit dienstbereitem Kinderneurologen und Computertomographie transportiert werden.

**Schwerverletzte/Polytrauma**

Verletzungen zählen seit Jahren zu den häufigsten Einweisungsanlässen bei Kindern und Jugendlichen. Im Jahr 2010 mussten rund 196.000 Kinder unter 15 Jahren wegen einer Verletzung im Krankenhaus behandelt werden. Ab dem Alter von einem Lebensjahr sind Verletzungen die häufigste Todesursache bei Kindern und Jugendlichen. Im Jahr 2010 starben hieran insgesamt 1.003 Kinder und Jugendliche, darunter 347 Kinder (unter 15 Jahren) und 656 Jugendliche (15 – 19 Jahre) [[4](#_ENREF_4)].

Die S3-Leitlinie Polytrauma/Schwerverletztenversorgung [[5](#_ENREF_5)] enthält keine kinder-spezifischen Empfehlungen für Diagnostik und Therapie im Rahmen der prähospitalen oder frühklinischen Beurteilung und Therapie. Die Primärversorgung erfolgt nach denselben diagnostischen und therapeutischen Leitlinien wie bei Erwachsenen [[6](#_ENREF_6)]. Es ist aber unklar, ob das Zeitmanagement der prähospitalen Versorgung für Kinder angepasst werden sollte [[7](#_ENREF_7), [8](#_ENREF_8)].

Ein geeignetes Krankenhaus ist z.B. ein zertifiziertes Traumazentrum gemäß den Kriterien der DGU. Das Weißbuch 2012 der Gesellschaft für Unfallchirurgie enthält eine Stellungnahme bezüglich Ausstattungsempfehlung zur Schockraum­versorgung von Kindern, die implementiert werden sollte [[9](#_ENREF_9)]. Bei der Auswahl des Zielkrankenhauses sollten Häuser mit ausgewiesener kindertraumatologischer Kompetenz oder einer eigenen Abteilung für Kinderchirurgie bevorzugt werden. Erfolgt die Therapie in einer interdisziplinären Notaufnahme in einem Krankenhaus ohne Kinderklinik, so muss eine vorher etablierte Verfahrensweise zur Weiterverlegung an eine Kinderabteilung oder Kinderklinik mit Kinderchirurgie und Kinderintensivstation bestehen.

Wie auch beim Erwachsenen wird sich die frühklinische Versorgung am Verletzungsmuster und an den einschlägigen Empfehlungen zur Traumaversorgung orientieren. Die Durchführung einer Ganzkörpercomputertomographie ist bei Säuglingen und Kleinkindern im Vergleich zu Erwachsenen weniger häufig indiziert und muss individuell bei jedem Patienten in Abwägung von Strahlenbelastung und Notwendigkeit abgewogen werden. Anders als beim Erwachsenen sollte eine routinemäßige Traumaspirale keinesfalls einfach unkritisch bei jedem Kind durchgeführt werden. Die CT-Diagnostik muss jeweils individuell gestellt werden. Bei vitaler Indikation darf jedoch eine radiologische Diagnostik nicht hinausgezögert werden, vor allem, wenn von der Bildgebung eine Managemententscheidung abhängig ist. Die Ultraschalldiagnostik insbesondere des Abdomens ist von besonderer Bedeutung, da im Kleinkindes- und Säuglingsalter eine Entscheidung zur konservativen Therapie initial z.B. bei V. a. Milzruptur manchmal auch ohne CT-Diagnostik erfolgen kann.

**Sepsis**

Als besonders relevantes Krankheitsbild in der präklinischen Situation tritt bei Kindern und Jugendlichen die Meningokokken-Sepsis auf.

Bei der Diagnostik steht neben den üblichen Sepsiskriterien insbesondere die Kreislaufbeurteilung präferenziell durch die Bewertung der Kapillarfüllungszeit im Vordergrund. Diese sollte am Stamm oder über der Stirn bestimmt werden und normwertig nicht mehr als 2 Sek. betragen. Bei Vorliegen einer Sepsis ist diese auf 3 Sek. oder mehr verlängert und stellt eine spezifische und frühe Untersuchungsmethode dar. Der arterielle Blutdruck und der Schockindex sind präklinisch nicht geeignet. Selbst bei Vorliegen eines normalen Blutdrucks ist eine Sepsis im Kindesalter keineswegs ausgeschlossen. Das häufig vorliegende typische Exanthem mit Petechien und Hautblutungen bei Meningokokken-Sepsis muss am entkleideten Patienten gesucht werden.

Essentiell zur Frühbehandlung der Sepsis ist die hochdosierte Volumenzufuhr. Gelingt beim Kind im Schock ein entsprechend dimensionierter venöser Zugang nicht innerhalb von einer Minute, ist nach ERC-Leitlinien beim lebensbedrohlich erkrankten Kind sofort ein intraossärer Zugang indiziert [[10](#_ENREF_10)]. Die Volumenzufuhr muss in wenigen Minuten gewichtsangepasst als repetitive Bolusgabe erfolgen. Zielparameter ist unter anderem eine Normalisierung der Kapillarfüllungszeit. Hierbei werden in den ersten 15 min. der Versorgung 3 x 20ml/kg einer kristalloiden isotonen Lösung infundiert [[11](#_ENREF_11)]. Diese Flüssigkeitsmengen können nur durch spritzenweise Applikation „aus der Hand“ erreicht werden.

Eine präklinische Antibiotikagabe sollte nur bei langen Transportzeiten erwogen werden und darf keinesfalls zu Einschränkungen der Stabilisierung der Kreislauffunktion durch die Volumengabe führen. Da eine präklinische Blutentnahme beim Kind im Schock eine große Herausforderung darstellt, sollte auf die Entnahme einer Blutkultur verzichtet werden. Ggf. kann durch das aufnehmende Krankenhaus trotz bereits begonnener Antibiotikatherapie die Erregeridentifikation mittels Eu-Bakterien-PCR-Untersuchung durchgeführt werden.

**ST- Hebungs-Infarkt**

Dieses Krankheitsbild kommt im Kindesalter praktisch nicht vor. Ausgenommen sind Patienten mit angeborenen oder erworbenen Koronaranomalien, z.B. mit Anamnese eines Kawasaki Syndroms (sehr selten =antibiotikaresistentes Fieber, Exanthem, Konjunktivitis, cervikale Lymphadenopathie, kann zu Beteiligung der Koronararterien führen im Sinne einer Vaskulitis oder Aneurysmen). Meist (75%) tritt der Infarkt im 1. Jahr nach dem Kawasaki Syndrom auf, die Symptome sind atypisch und die Diagnose oft verzögert. Die Diagnostik unterscheidet sich nicht wesentlich vom Erwachsenenalter, zur Therapie gibt es keine Studien. Empfohlen werden jedoch initial ähnliche Maßnahmen wie beim Erwachsenen, einschließlich der Antikoagulation (Aspirin 3-5mg/kg, evtl. rtPA 0,6-1mg/kg/Std für 1 Stunde dann 0,12mg/kg/Std. für 6 Stunden + Heparin (60I.E./kg, dann 12I.E./kg/Std.)). Die Therapie sollte von einem Kinderkardiologen gesteuert werden und ist wegen der Blutungsgefahr komplex. Katheterinterventionen scheinen wenig erfolgreich zu sein [[12](#_ENREF_12)].

**Reanimation bei plötzlichem Kreislaufstillstand**

Die Therapie erfolgt nach den Empfehlungen der ERC-Leitlinien zur Reanimation im Kindesalter [[10](#_ENREF_10)]. Inhaltliche Unterschiede ergeben sich aus dem Umstand, dass kindliche Herzkreislaufstillstände vornehmlich auf respiratorische Ursachen zurückzuführen sind und dass es sich bei den in diesem Zusammenhang vorherrschend beobachteten Rhythmusstörungen eher um Asystolien statt Kammerflimmern handelt. Im Vordergrund steht im Gegensatz zum Erwachsenen die große Bedeutung der Atemspende. Eine Chest-compression-only-Strategie kann nicht umgesetzt werden. Das zur Beherrschung der Kinderreanimation notwendige Material muss auf allen Rettungsmitteln vorgehalten werden.

Eine therapeutische Hypothermie nach Reanimation mit persistentem Koma ist jenseits der Neugeborenen Periode bei Kindern bisher nicht wissenschaftlich untermauert. Daher erfordert die Entscheidung zu einer eventuellen Anwendung besondere klinische kinderintensivmedizinische Erfahrung und eine Einwilligung als Therapieversuch.

Die Weiterversorgung sollte auf einer Kinderintensivstation mit Expertise in der Postreanimationsbehandlung erfolgen sowie die Möglichkeit eines CCT bei V. a. hypoxisches Hirnödem beinhalten.

**Literatur**

1. Kuppermann, N., et al., *Identification of children at very low risk of clinically-important brain injuries after head trauma: a prospective cohort study.* Lancet, 2009. **374**(9696): p. 1160-70.

2. Wylie, M.C., et al., *Imaging of pediatric head injury in the emergency department.* Pediatr Emerg Care, 2014. **30**(10): p. 680-5.

3. Mallick, A.A., et al., *Diagnostic delays in paediatric stroke.* J Neurol Neurosurg Psychiatry, 2014.

4. Ellsäßer, G., *Unfälle, Gewalt, Selbstverletzung bei Kindern und Jugendlichen 2012. Ergebnisse der amtlichen Statistik zum Verletzungsgeschehen 2010. Fachbericht*, Statistisches Bundesamt, Editor. 2012: Wiesbaden. p. 1-52.

5. Deutsche Gesellschaft für Unfallchirurgie. *S3 – Leitlinie Polytrauma/Schwerverletzten-Behandlung*, 2011. Herunterladen unter: <http://www.awmf.org/leitlinien/detail/ll/012-019.html> [letzter Zugriff: 15.12.2015].

6. McFadyen, J.G., R. Ramaiah, and S.M. Bhananker, *Initial assessment and management of pediatric trauma patients.* Int J Crit Illn Inj Sci, 2012. **2**(3): p. 121-7.

7. Laurer, H., et al., *[Quality of prehospital and early clinical care of pediatric trauma patients of school age compared to an adult cohort. A matched-pair analysis of 624 patients from the DGU trauma registry].* Unfallchirurg, 2009. **112**(9): p. 771-7.

8. Wyen, H., et al., *The golden hour of shock - how time is running out: prehospital time intervals in Germany--a multivariate analysis of 15, 103 patients from the TraumaRegister DGU(R).* Emerg Med J, 2013. **30**(12): p. 1048-55.

9. Deutsche Gesellschaft für Unfallchirurgie, *Weißbuch Schwerverletztenversorgung, 2. erweiterte Auflage - Empfehlungen zur Struktur, Organisation und Ausstattung der Schwerverletztenversorgung in der Bundesrepublik Deutschland.* Orthopädie und Unfallchirurgie Mitteilung und Nachrichten, 2012(Supplement 1): p. 4-34.

10. Biarent, D., et al., *European Resuscitation Council Guidelines for Resuscitation 2010 Section 6. Paediatric life support.* Resuscitation, 2010. **81**(10): p. 1364-88.

11. Dellinger, R.P., et al., *Surviving Sepsis Campaign: international guidelines for management of severe sepsis and septic shock, 2012.* Intensive Care Med, 2013. **39**(2): p. 165-228.

12. Paredes, N., et al., *Management of myocardial infarction in children with Kawasaki disease.* Blood Coagul Fibrinolysis, 2010. **21**(7): p. 620-31.
